# Supplementary material for: Palladium-catalyzed tandem reaction of 2-hydroxyarylacetonitriles with sodium sulfinates: one-pot synthesis of 2-arylbenzofurans
Source: Royal Society of Chemistry journal article supplement (doi:10.1039/c4ob00575a), 2014-01-01
Supplement: c4ob00575a1.pdf [file c4ob00575a1.pdf]

## Supporting Information

### **Palladium-catalyzed tandem reaction of 2-hydroxyarylacetonitriles with sodium sulfinates: one-pot synthesis of 2-arylbenzofurans**

Jiuxi Chen,<sup>a,b</sup> Jianjun Li<sup>a</sup> and Weike Su\*<sup>a</sup>

<sup>a</sup> Key Laboratory for Green Pharmaceutical Technologies and Related Equipment of Ministry of Education,  
College of Pharmaceutical Sciences, Zhejiang University of Technology, Hangzhou 310014, China.

E-mail: [pharmlab@zjut.edu.cn](mailto:pharmlab@zjut.edu.cn)

<sup>b</sup> College of Chemistry & Materials Engineering, Wenzhou University, Wenzhou 325035, P. R. China.

### List of Contents

|                                                                           |            |
|---------------------------------------------------------------------------|------------|
| <b>1. General experimental details.....</b>                               | <b>S2</b>  |
| <b>2. General procedure.....</b>                                          | <b>S2</b>  |
| <b>3. Control experiments.....</b>                                        | <b>S3</b>  |
| <b>4. Analytical data for products.....</b>                               | <b>S5</b>  |
| <b>5. Copies of product <sup>1</sup>H NMR and <sup>13</sup>C NMR.....</b> | <b>S10</b> |

## 1. General experimental details

Chemicals were either purchased or purified by standard techniques without special instructions.  $^1\text{H}$  NMR and  $^{13}\text{C}$  NMR spectra were measured on a 500 MHz Bruker spectrometer, using  $\text{CDCl}_3$  as the solvent with tetramethylsilane (TMS) as the internal standard at room temperature. Chemical shifts are given in  $\delta$  relative to TMS, the coupling constants  $J$  are given in Hz. All reactions were conducted under air atmosphere. Column chromatography was performed using EM Silica gel 60 (300-400 mesh). All products are known compounds and identified by comparison with authentic samples. Analytical data and spectra ( $^1\text{H}$  and  $^{13}\text{C}$  NMR) of all products are supplied in the Supporting Information.

## 2. General procedure

Under  $\text{N}_2$  atmosphere, a Schlenk tube was charged with 2-hydroxyarylacetonitriles **1** (0.3 mmol), sodium sulfinates **2** (0.6 mmol),  $\text{Pd}(\text{OAc})_2$  (10 mol %), **L1** (20 mol %), *p*-NBSA (10 equiv), 2-MeTHF (2 mL), and  $\text{H}_2\text{O}$  (1 mL) at room temperature. The reaction mixture was stirred vigorously at 80 °C for 36 h. After the completion of the reaction, as monitored by TLC and GC-MS analysis, the reaction mixture was cooled to room temperature. The mixture was poured into ethyl acetate, which was washed with saturated  $\text{NaHCO}_3$  ( $2 \times 10$  mL) and then brine ( $1 \times 10$  mL). After the aqueous layer was extracted with ethyl acetate, the combined organic layers were dried over anhydrous  $\text{Na}_2\text{SO}_4$  and evaporated under a vacuum. The residue was purified by flash column chromatography (hexane/ethyl acetate as eluent) to afford the desired products **3**.

### 3. Control experiments

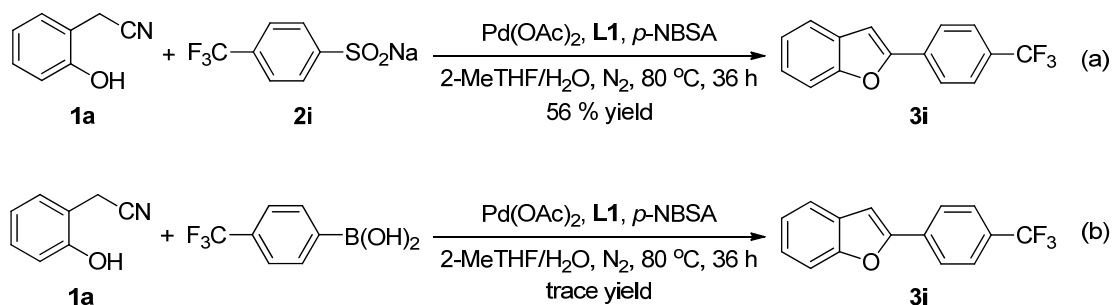

*Scheme S1*

Under  $\text{N}_2$  atmosphere, a Schlenk tube was charged with **1a** (0.3 mmol), (4-(trifluoromethyl)phenyl)boronic acid (0.6 mmol),  $\text{Pd}(\text{OAc})_2$  (10 mol %), **L1** (20 mol %), *p*-NBSA (10 equiv), 2-MeTHF (2 mL), and  $\text{H}_2\text{O}$  (1 mL) at room temperature. The reaction mixture was stirred vigorously at  $80\text{ }^\circ\text{C}$  for 36 h. Trace target product **3i** was detected by GC/MS analysis.

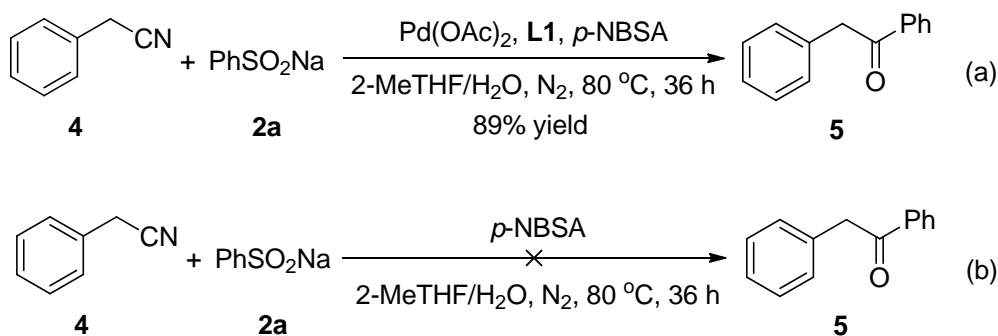

*Scheme S2*

Under  $\text{N}_2$  atmosphere, a Schlenk tube was charged with **4** (0.3 mmol), **2a** (0.6 mmol),  $\text{Pd}(\text{OAc})_2$  (10 mol %), **L1** (20 mol %), *p*-NBSA (10 equiv), 2-MeTHF (2 mL), and  $\text{H}_2\text{O}$  (1 mL) at room temperature. The reaction mixture was stirred vigorously at  $80\text{ }^\circ\text{C}$  for 36 h. The mixture was poured into ethyl acetate, which was washed with saturated  $\text{NaHCO}_3$  ( $2 \times 10\text{ mL}$ ) and then brine ( $1 \times 10\text{ mL}$ ). After the aqueous layer was extracted with ethyl acetate, the combined organic layers were dried over anhydrous  $\text{Na}_2\text{SO}_4$  and evaporated under a vacuum. The residue was purified by flash column chromatography (hexane/ethyl acetate as eluent) to afford the desired products **5** (89% yield).

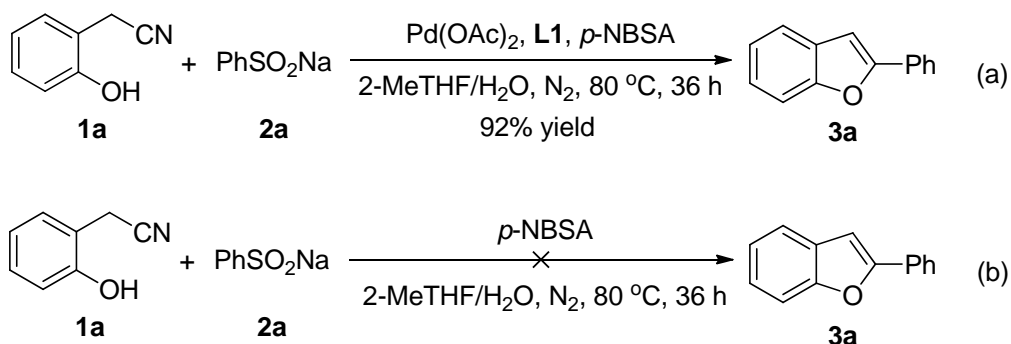

**Scheme S3**

Under N<sub>2</sub> atmosphere, a Schlenk tube was charged with **1a** (0.3 mmol), **2a** (0.6 mmol), *p*-NBSA (10 equiv), 2-MeTHF (2 mL), and H<sub>2</sub>O (1 mL) at room temperature. The reaction mixture was stirred vigorously at 80 °C for 36 h. No target product **3a** was detected by GC/MS analysis.

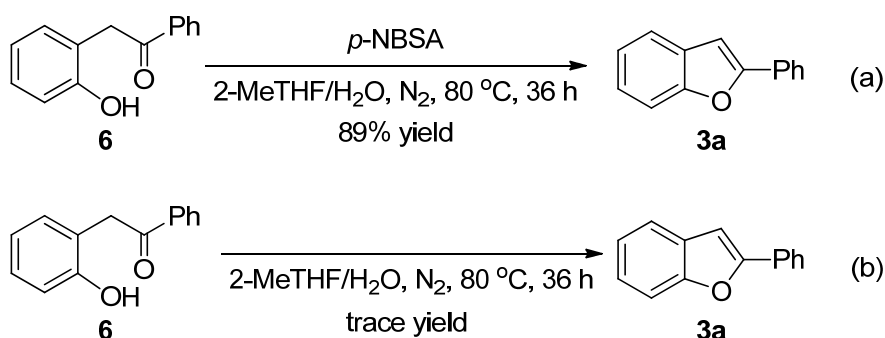

**Scheme S4**

Under N<sub>2</sub> atmosphere, a Schlenk tube was charged with **6** (0.3 mmol), *p*-NBSA (10 equiv), 2-MeTHF (2 mL), and H<sub>2</sub>O (1 mL) at room temperature. The reaction mixture was stirred vigorously at 80 °C for 36 h. The mixture was poured into ethyl acetate, which was washed with saturated NaHCO<sub>3</sub> (2 × 10 mL) and then brine (1 × 10 mL). After the aqueous layer was extracted with ethyl acetate, the combined organic layers were dried over anhydrous Na<sub>2</sub>SO<sub>4</sub> and evaporated under a vacuum. The residue was purified by flash column chromatography (hexane/ethyl acetate as eluent) to afford the desired products **3a** (89% yield). However, trace yield of desired product **3a** was observed by GC/MS analysis in the absence of *p*-NBSA.

#### 4. Analytical data for all products

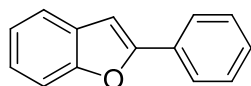

*2-Phenylbenzofuran (3a)*: White solid, mp 120–121 °C (Lit.<sup>1</sup> 121.6–122.2 °C); <sup>1</sup>H NMR(CDCl<sub>3</sub>, 500 MHz) δ 7.86 (d, *J* = 7.5 Hz, 2H), 7.57 (d, *J* = 7.6 Hz, 1H), 7.52 (d, *J* = 8.1 Hz, 1H), 7.44 (t, *J* = 7.8 Hz, 2H), 7.34 (t, *J* = 7.4 Hz, 1H), 7.29–7.27 (m, 1H), 7.24–7.21 (m, 1H), 7.01 (s, 1H); <sup>13</sup>C NMR (CDCl<sub>3</sub>, 125 MHz) δ 156.0, 155.0, 130.6, 129.3, 128.9, 128.6, 125.0, 124.4, 123.0, 121.0, 111.3, 101.4.

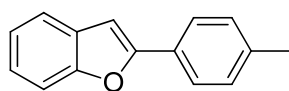

*2-p-Tolylbenzofuran (3b)*: White solid, mp 126–127 °C (Lit.<sup>2</sup> 126–128 °C); <sup>1</sup>H NMR (CDCl<sub>3</sub>, 500 MHz): δ 7.76 (d, *J* = 8.2 Hz, 2H), 7.56 (d, *J* = 7.5 Hz, 1H), 7.50 (d, *J* = 8.0 Hz, 1H), 7.28–7.19 (m, 4H), 6.95 (s, 1H), 2.39 (s, 3H); <sup>13</sup>C NMR (CDCl<sub>3</sub>, 125 MHz) δ 156.3, 154.8, 138.6, 129.5, 129.4, 127.8, 124.9, 124.0, 122.9, 120.8, 111.1, 100.6, 21.4.

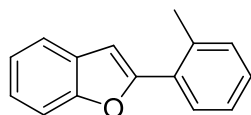

*2-o-Tolylbenzofuran (3c)*: Oil,<sup>3</sup> <sup>1</sup>H NMR (CDCl<sub>3</sub>, 500 MHz): δ 7.86 (d, *J* = 6.8 Hz, 1H), 7.60 (d, *J* = 7.6 Hz, 1H), 7.55 (d, *J* = 8.1 Hz, 1H), 7.31–7.22 (m, 5H), 6.89 (s, 1H), 2.58 (s, 3H); <sup>13</sup>C NMR (CDCl<sub>3</sub>, 125 MHz) δ 154.6, 153.3, 134.8, 130.2, 128.9, 128.1, 127.5, 127.1, 125.1, 123.2, 121.7, 119.9, 110.1, 104.1, 20.9.

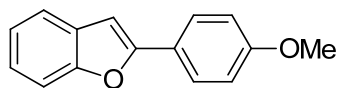

*2-(4-Methoxyphenyl)benzofuran (3d)*: White solid, mp 151–152 °C (Lit.<sup>4</sup> 148–150 °C); <sup>1</sup>H NMR (CDCl<sub>3</sub>, 500 MHz): δ 7.79 (d, *J* = 8.8 Hz, 2H), 7.54 (d, *J* = 7.1 Hz, 1H), 7.50 (d, *J* = 8.0 Hz, 1H), 7.24–7.19 (m, 2H), 6.97 (d, *J* = 8.8 Hz, 2H), 6.87 (s, 1H), 3.85 (s, 3H); <sup>13</sup>C NMR (CDCl<sub>3</sub>, 125 MHz) δ 160.1, 156.1, 154.8, 129.6, 126.5, 123.8,

<sup>1</sup> Ackermann, L.; Kaspar, L. T. *J. Org. Chem.* **2007**, *72*, 6149.

<sup>2</sup> Kabalka, G. M.; Wang, L.; Pagni, R. M. *Tetrahedron* **2001**, *57*, 8017.

<sup>3</sup> Astoin, J.; Demerseman, P.; Riveron, A.; Royer, R. *J. Heterocycl. Chem.* **1977**, *14*, 867.

<sup>4</sup> Jaseer, E. A.; Prasad, D. J. C.; Sekar, G. *Tetrahedron* **2010**, *66*, 2077.

123.4, 122.9, 120.6, 114.3, 111.0, 99.7, 55.4.

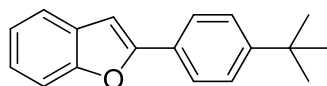

2-(4-*tert*-Butylphenyl)benzofuran (**3e**): White solid, mp 131–132 °C (Lit.<sup>5</sup> 132 °C); <sup>1</sup>H NMR (CDCl<sub>3</sub>, 500 MHz): δ 7.82 (d, *J* = 8.5 Hz, 2H), 7.59 (d, *J* = 7.4 Hz, 1H), 7.54 (d, *J* = 8.0 Hz, 1H), 7.49 (d, *J* = 8.5 Hz, 2H), 7.28 (t, *J* = 7.6 Hz, 1H), 7.24 (t, *J* = 7.1 Hz, 1H), 6.99 (s, 1H), 1.38 (s, 9H); <sup>13</sup>C NMR (CDCl<sub>3</sub>, 125 MHz) δ 156.0, 154.7, 151.6, 129.2, 127.6, 125.6, 124.6, 123.8, 122.7, 120.6, 110.9, 100.5, 34.6, 31.1.

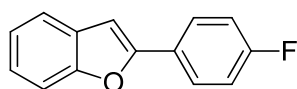

2-(4-Fluorophenyl)benzofuran (**3f**): White solid, mp 123–124 °C (Lit.<sup>6</sup> 122–124 °C); <sup>1</sup>H NMR (CDCl<sub>3</sub>, 500 MHz): δ 7.86–7.83 (m, 2H), 7.59 (d, *J* = 7.6 Hz, 1H), 7.52 (d, *J* = 8.1 Hz, 1H), 7.30 (t, *J* = 7.5 Hz, 1H), 7.24 (t, *J* = 7.4 Hz, 1H), 7.15 (t, *J* = 8.7 Hz, 2H), 6.96 (s, 1H); <sup>13</sup>C NMR (CDCl<sub>3</sub>, 125 MHz) δ 163.7, 161.7, 154.9, 154.7, 129.0, 126.7, 126.6, 126.6, 124.1, 122.9, 120.7, 115.8, 115.6, 111.0, 100.84, 100.83.

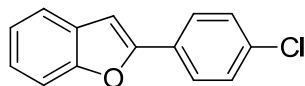

2-(4-Chlorophenyl)benzofuran (**3g**): White solid; mp 147–148 °C (Lit.<sup>7</sup> 148–149 °C); <sup>1</sup>H NMR (CDCl<sub>3</sub>, 500 MHz) δ 7.79 (d, *J* = 8.6 Hz, 2H), 7.59 (d, *J* = 7.6 Hz, 1H), 7.52 (d, *J* = 8.2 Hz, 1H), 7.42 (d, *J* = 8.6 Hz, 2H), 7.31 (t, *J* = 7.7 Hz, 1H), 7.25 (t, *J* = 7.4 Hz, 1H), 7.01 (s, 1H); <sup>13</sup>C NMR (CDCl<sub>3</sub>, 125 MHz) δ 154.7, 154.6, 134.2, 128.9, 128.9, 128.8, 126.0, 124.4, 122.9, 120.8, 111.0, 101.6.

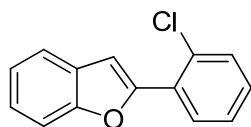

2-(2-Chlorophenyl)benzofuran (**3h**): White solid; mp 46–47 °C (Lit.<sup>8</sup> 45–46 °C); <sup>1</sup>H NMR (CDCl<sub>3</sub>, 500 MHz) δ 8.06 (d, *J* = 7.9 Hz, 1H), 7.64 (d, *J* = 7.7 Hz, 1H), 7.54–7.49 (m, 3H), 7.39 (t, *J* = 7.6 Hz, 1H), 7.34–7.30 (m, 2H), 7.29–7.27 (m, 1H); <sup>13</sup>C

<sup>5</sup> Astoin, J.; Demerseman, P.; Riveron, A.; Royer, R. *J. Heterocycl. Chem.* **1977**, *14*, 867.

<sup>6</sup> Chittimalla, S. K.; Chang, T.-C.; Liu, T.-C.; Hsieh, H.-P.; Liao, C.-C. *Tetrahedron* **2008**, *64*, 2586.

<sup>7</sup> Ghosh, S.; Das, J. *Tetrahedron Lett.* **2011**, *52*, 1112.

<sup>8</sup> Carril, M.; Martin, R. S.; Tellitu, I.; Domínguez, E. *Org. Lett.* **2006**, *8*, 1467

NMR (CDCl<sub>3</sub>, 125 MHz)  $\delta$  154.2, 152.0, 149.2, 131.3, 130.9, 129.1, 129.0, 127.0, 124.9, 123.0, 121.5, 121.1, 111.1, 107.4.

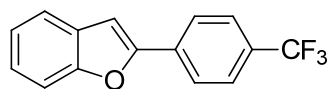

2-(4-(Trifluoromethyl)phenyl)benzofuran (**3i**): White solid; mp 159–161 °C (Lit.<sup>9</sup> 162–163 °C); <sup>1</sup>H NMR (CDCl<sub>3</sub>, 500 MHz)  $\delta$  7.94 (d, *J* = 8.2 Hz, 2H), 7.68 (d, *J* = 8.3 Hz, 2H), 7.60 (d, *J* = 7.7 Hz, 1H), 7.53 (d, *J* = 8.2 Hz, 1H), 7.32 (t, *J* = 7.2 Hz, 1H), 7.25–7.24 (m, 1H), 7.11 (s, 1H); <sup>13</sup>C NMR (CDCl<sub>3</sub>, 125 MHz)  $\delta$  155.1, 154.1, 133.6, 129.9, 128.8, 125.8, 125.7, 125.7, 125.6, 125.1, 125.0, 124.9, 123.2, 121.2, 111.3, 103.2.

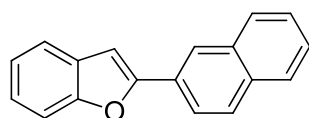

2-(Naphthalen-2-yl)benzofuran (**3j**): White solid, mp 162–163 °C (Lit.<sup>10</sup> 163 °C); <sup>1</sup>H NMR (CDCl<sub>3</sub>, 500 MHz)  $\delta$  8.37 (s, 1H), 7.94–7.87 (m, 3H), 7.83 (d, *J* = 8.8 Hz, 1H), 7.61 (d, *J* = 7.6 Hz, 1H), 7.56 (d, *J* = 8.1 Hz, 1H), 7.53–7.47 (m, 2H), 7.30 (t, *J* = 7.7 Hz, 1H), 7.24–7.23 (m, 1H), 7.13 (s, 1H); <sup>13</sup>C NMR (CDCl<sub>3</sub>, 125 MHz)  $\delta$  155.8, 154.9, 133.3, 133.1, 128.3, 128.3, 127.6, 126.5, 126.3, 124.2, 123.7, 122.8, 122.6, 120.8, 111.0, 101.8.

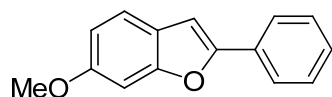

6-Methoxy-2-phenylbenzofuran (**3k**): White solid, mp 80–81 °C (Lit.<sup>11</sup> 79–81 °C); <sup>1</sup>H NMR (CDCl<sub>3</sub>, 500 MHz)  $\delta$  7.82 (d, *J* = 8.0 Hz, 2H), 7.44 (t, *J* = 8.5 Hz, 3H), 7.33 (t, *J* = 7.4 Hz, 1H), 7.08 (s, 1H), 6.96 (s, 1H), 6.87–6.90 (m, 1H), 3.88 (s, 3H); <sup>13</sup>C NMR (CDCl<sub>3</sub>, 125 MHz)  $\delta$  158.1, 155.9, 155.2, 130.7, 128.8, 128.1, 124.5, 122.6, 120.9, 111.9, 101.2, 95.9, 55.8.

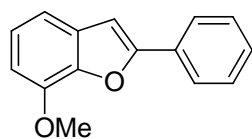

<sup>9</sup> Denmark, S. E.; Smith, R. C.; Chang, W.-T. T.; Muhuhi, J. M. *J. Am. Chem. Soc.* **2009**, *131*, 3104.

<sup>10</sup> Astoin, J.; Demerseman, P.; Riveron, A.; Royer, R. *J. Heterocycl. Chem.* **1977**, *14*, 867.

<sup>11</sup> Wang, X.; Liu, M.; Xu, L.; Wang, Q.; Chen, J.; Ding, J.; Wu, H. *J. Org. Chem.* **2013**, *78*, 5273.

*7-Methoxy-2-phenylbenzofuran (3l)*: White solid, mp 80–81 °C (Lit.<sup>12</sup> 79–80 °C); <sup>1</sup>H NMR (CDCl<sub>3</sub>, 500 MHz) δ 7.91 (d, *J* = 8.2 Hz, 2H), 7.45 (t, *J* = 7.7 Hz, 2H), 7.36 (t, *J* = 7.4 Hz, 1H), 7.21–7.15 (m, 2H), 7.03 (s, 1H), 6.82 (d, *J* = 7.6 Hz, 1H), 4.06 (s, 3H); <sup>13</sup>C NMR (CDCl<sub>3</sub>, 125 MHz) δ 155.1, 144.4, 143.2, 130.0, 129.4, 127.7, 127.6, 124.1, 122.6, 112.4, 105.7, 100.7, 55.2.

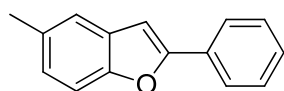

*5-Methyl-2-phenylbenzofuran (3m)*: White solid, mp 129–130 °C (Lit.<sup>13</sup> 128–129 °C); <sup>1</sup>H NMR (CDCl<sub>3</sub>, 500 MHz) δ 7.87 (d, *J* = 7.3 Hz, 2H), 7.45 (t, *J* = 7.7 Hz, 2H), 7.42 (d, *J* = 8.4 Hz, 1H), 7.38–7.34 (m, 2H), 7.11 (d, *J* = 8.3 Hz, 1H), 6.96 (s, 1H), 2.46 (s, 3H); <sup>13</sup>C NMR (CDCl<sub>3</sub>, 125 MHz) δ 156.3, 153.6, 132.6, 130.9, 129.6, 129.0, 128.7, 125.8, 125.1, 121.0, 110.9, 101.4, 21.6.

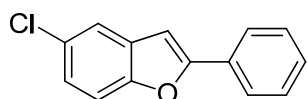

*5-Chloro-2-phenylbenzofuran (3n)*: White solid, mp 152–153 °C (Lit.<sup>14</sup> 154 °C); <sup>1</sup>H NMR (CDCl<sub>3</sub>, 500 MHz) δ 7.85 (d, *J* = 7.6 Hz, 2H), 7.55 (s, 1H), 7.48–7.43 (m, 3H), 7.38 (t, *J* = 7.4 Hz, 1H), 7.24 (d, *J* = 8.7 Hz, 1H), 6.96 (s, 1H); <sup>13</sup>C NMR (CDCl<sub>3</sub>, 125 MHz) δ 157.2, 153.1, 130.4, 129.8, 128.8, 128.7, 128.3, 124.9, 124.2, 120.2, 111.9, 100.6.

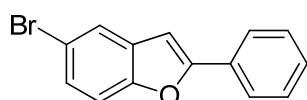

*5-Bromo-2-phenylbenzofuran (3o)*: White solid, mp 159–160 °C (Lit.<sup>15</sup> 158–159 °C); <sup>1</sup>H NMR (CDCl<sub>3</sub>, 500 MHz) δ 7.85 (d, *J* = 7.3 Hz, 2H), 7.71 (s, 1H), 7.46 (t, *J* = 7.6 Hz, 2H), 7.41–7.36 (m, 3H), 6.96 (s, 1H); <sup>13</sup>C NMR (CDCl<sub>3</sub>, 125 MHz) δ 157.0, 153.4, 131.0, 129.7, 128.8, 128.7, 126.9, 124.9, 123.3, 115.8, 112.4, 100.4.

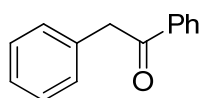

<sup>12</sup> Duan, X.-F.; Zeng, J.; Zhang, Z.-B.; Zi, G.-F. *J. Org. Chem.* **2007**, *72*, 10283.

<sup>13</sup> Duan, X.-F.; Zeng, J.; Zhang, Z.-B.; Zi, G.-F. *J. Org. Chem.* **2007**, *72*, 10283.

<sup>14</sup> Jaseer, E. A.; Prasad, D. J. C.; Sekar, G. *Tetrahedron* **2010**, *66*, 2077.

<sup>15</sup> Takeda, N.; Miyata, O.; Naito, T. *Eur. J. Org. Chem.* **2007**, 1491.



*1,2-Diphenylethanone (5)*. Yellow solid; mp 55-56 °C (Lit.<sup>16</sup> 59-60 °C); <sup>1</sup>H NMR (CDCl<sub>3</sub>, 500 MHz) δ 7.91 (d, *J* = 7.2 Hz, 2H), 7.44 (t, *J* = 7.7 Hz, 1H), 7.35 (t, *J* = 7.7 Hz, 2H), 7.22 (t, *J* = 7.4 Hz, 2H), 7.18-7.13 (m, 1H), 4.18 (s, 2H); <sup>13</sup>C NMR (CDCl<sub>3</sub>, 125 MHz) δ 196.6, 135.6, 133.5, 132.1, 128.4, 127.62, 127.59, 127.56, 125.8, 44.4.

---

<sup>16</sup> Ye, C.; Twamley, B.; Shreeve, J. M. *Org. Lett.* **2005**, *7*, 3961.

## 5. $^1\text{H}$ NMR and $^{13}\text{C}$ NMR spectra for all products

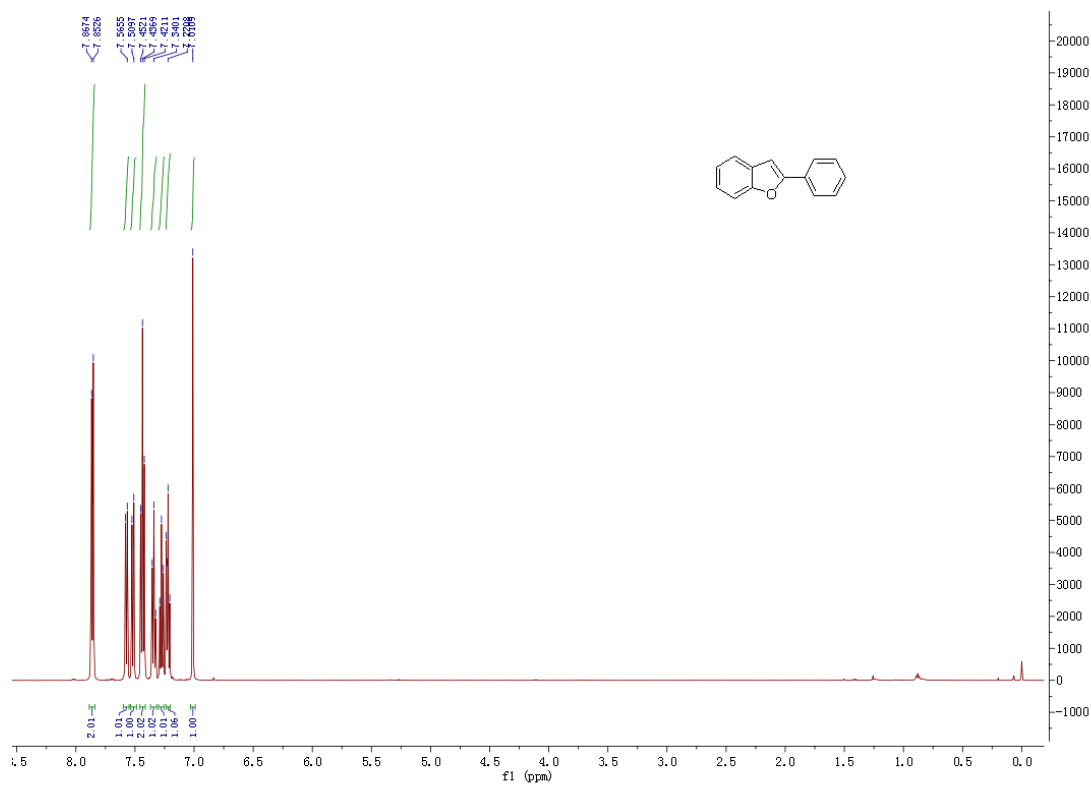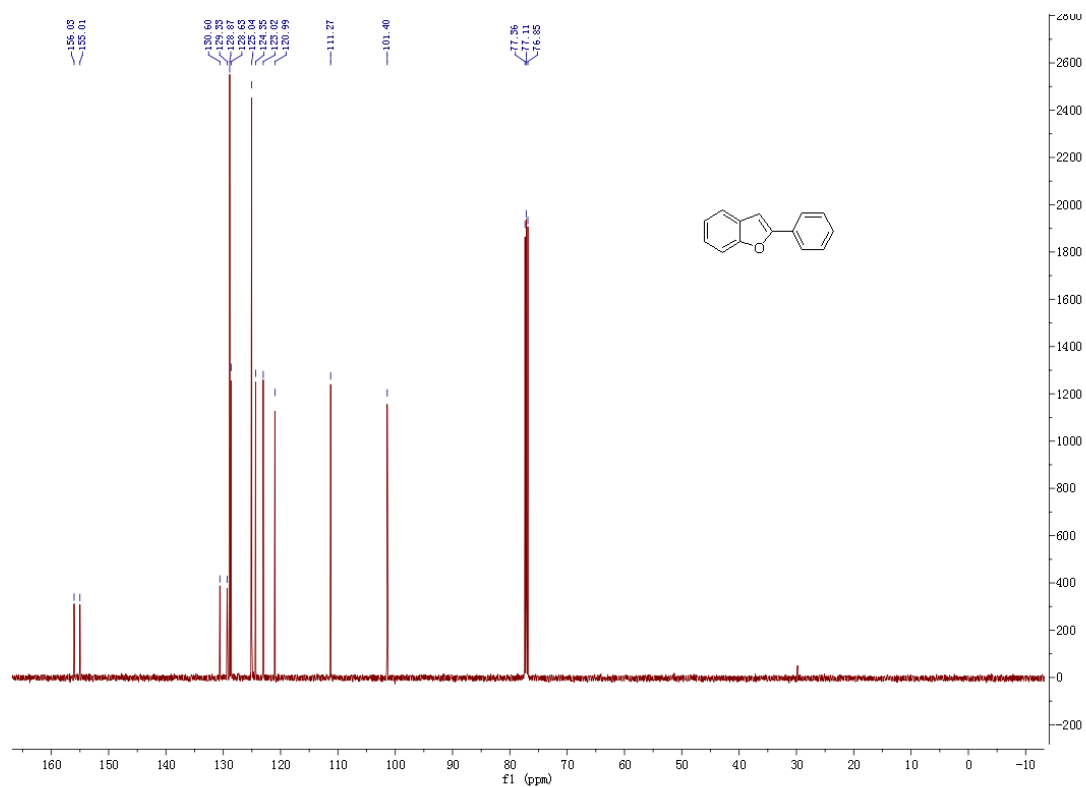

Figure S1.  $^1\text{H}$  NMR of **3a** (500 MHz,  $\text{CDCl}_3$ ) and  $^{13}\text{C}$  NMR of **3a** (125 MHz,  $\text{CDCl}_3$ ).

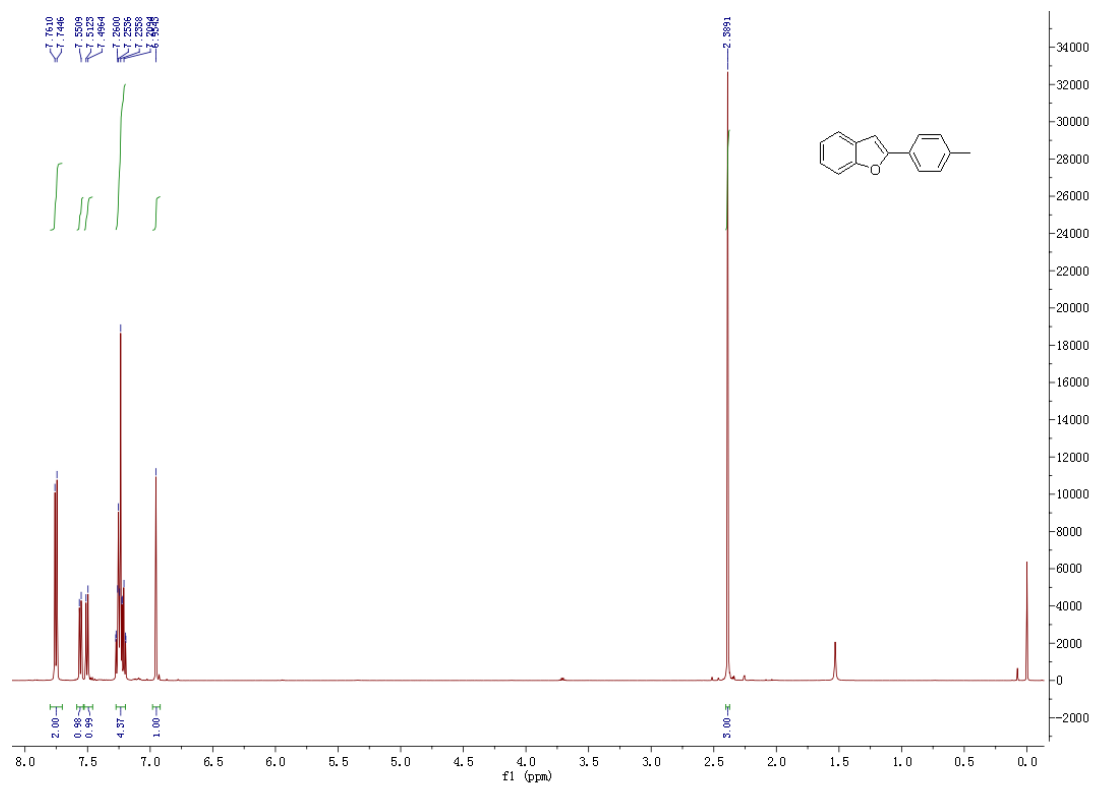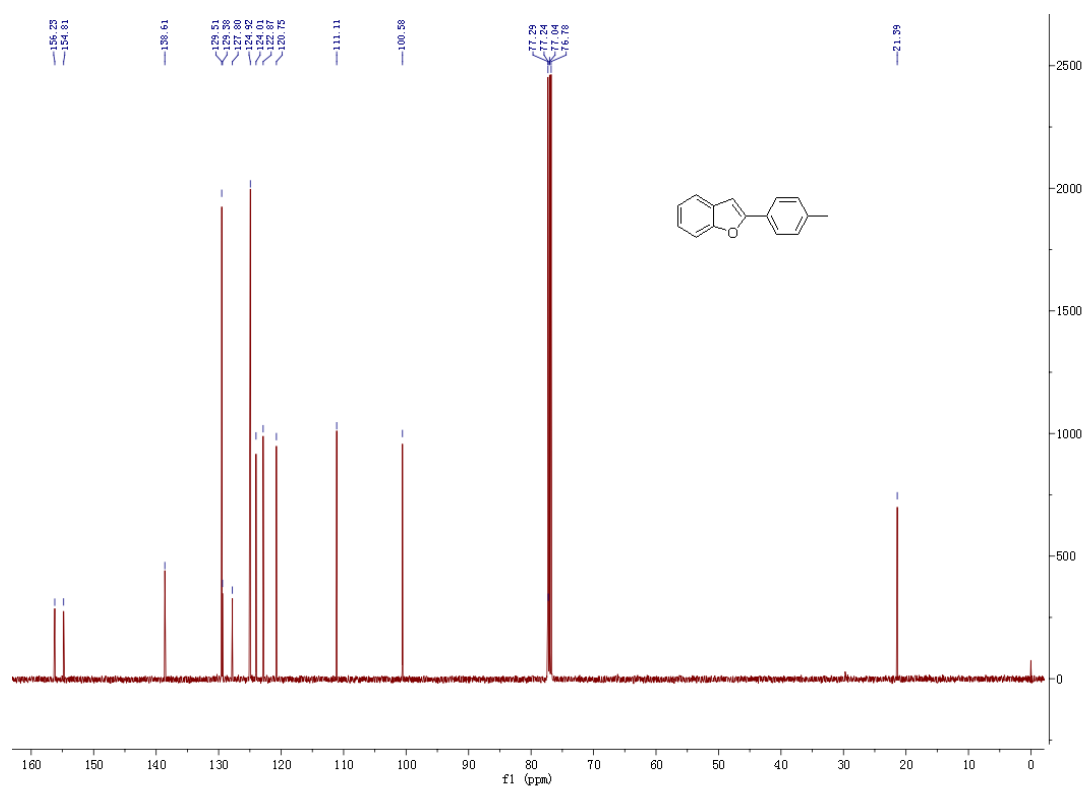

**Figure S2.** <sup>1</sup>H NMR of **3b** (500 MHz, CDCl<sub>3</sub>) and <sup>13</sup>C NMR of **3b** (125 MHz, CDCl<sub>3</sub>).

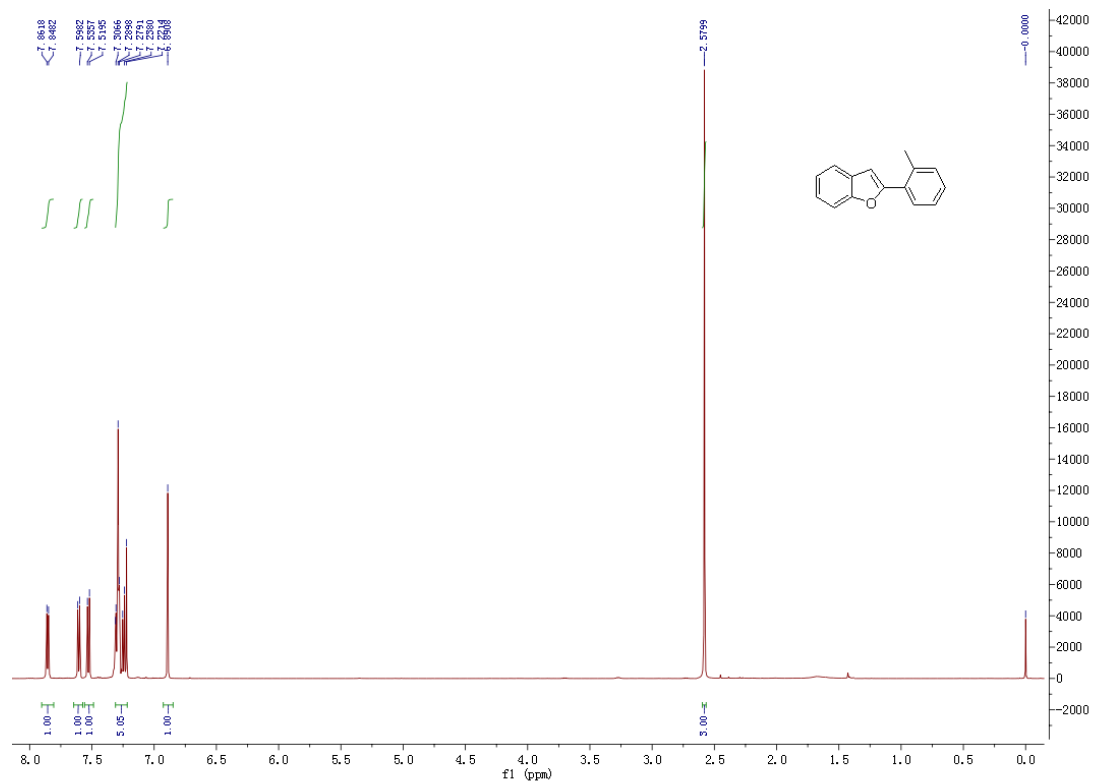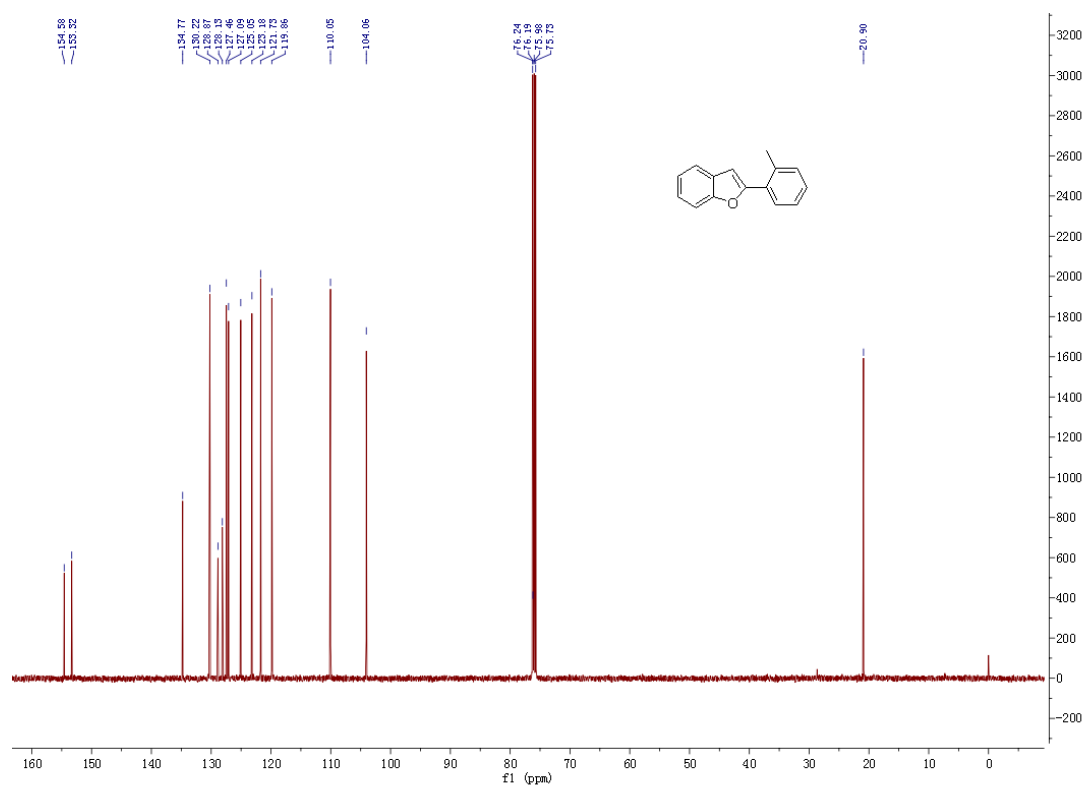

**Figure S3.**  $^1\text{H}$  NMR of **3c** (500 MHz,  $\text{CDCl}_3$ ) and  $^{13}\text{C}$  NMR of **3c** (125 MHz,  $\text{CDCl}_3$ ).

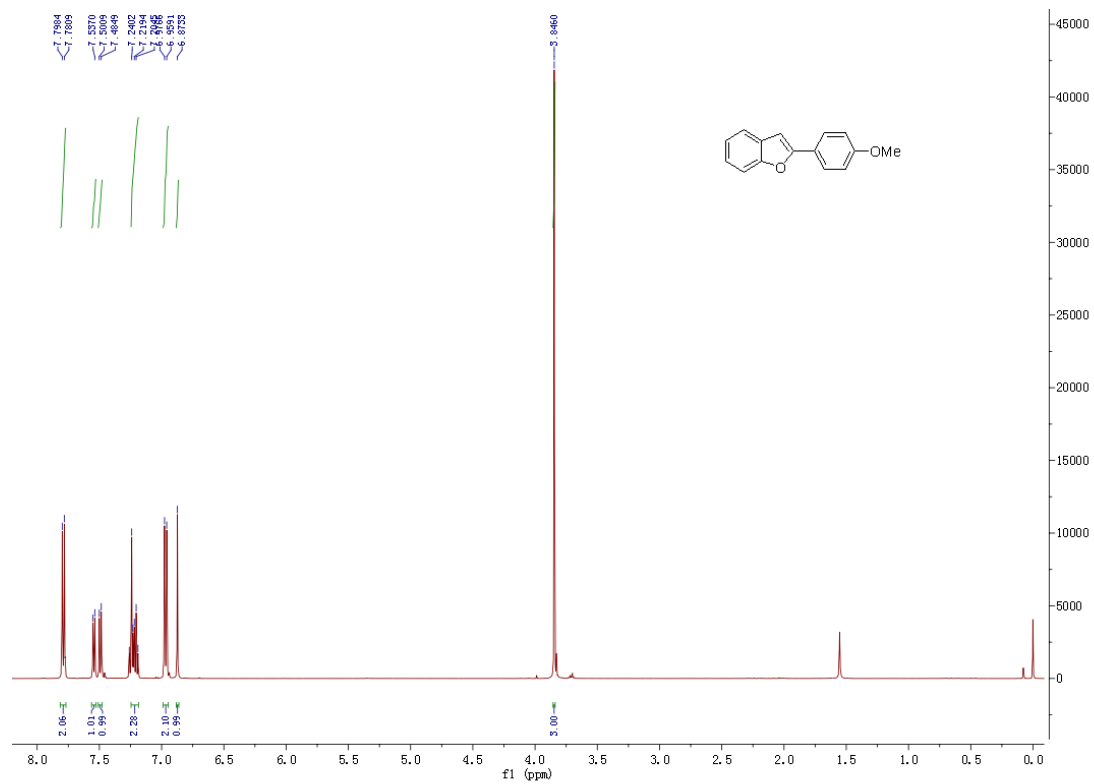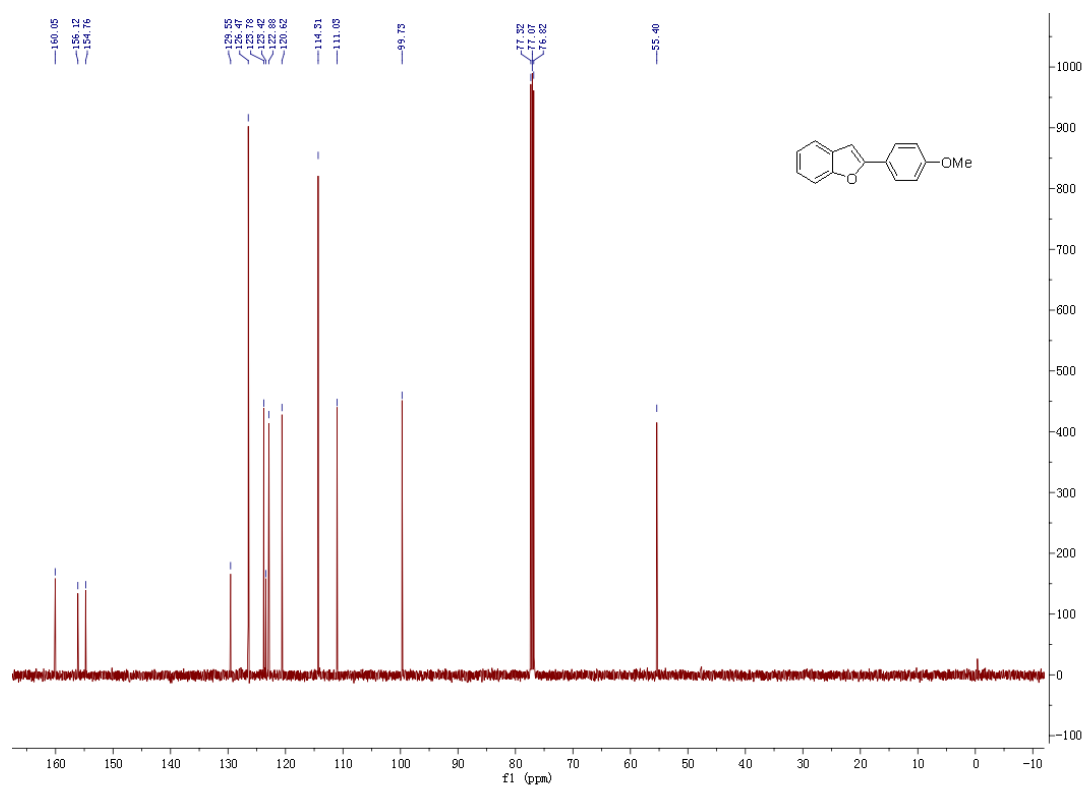

**Figure S4.** <sup>1</sup>H NMR of **3d** (500 MHz, CDCl<sub>3</sub>) and <sup>13</sup>C NMR of **3d** (125 MHz, CDCl<sub>3</sub>).

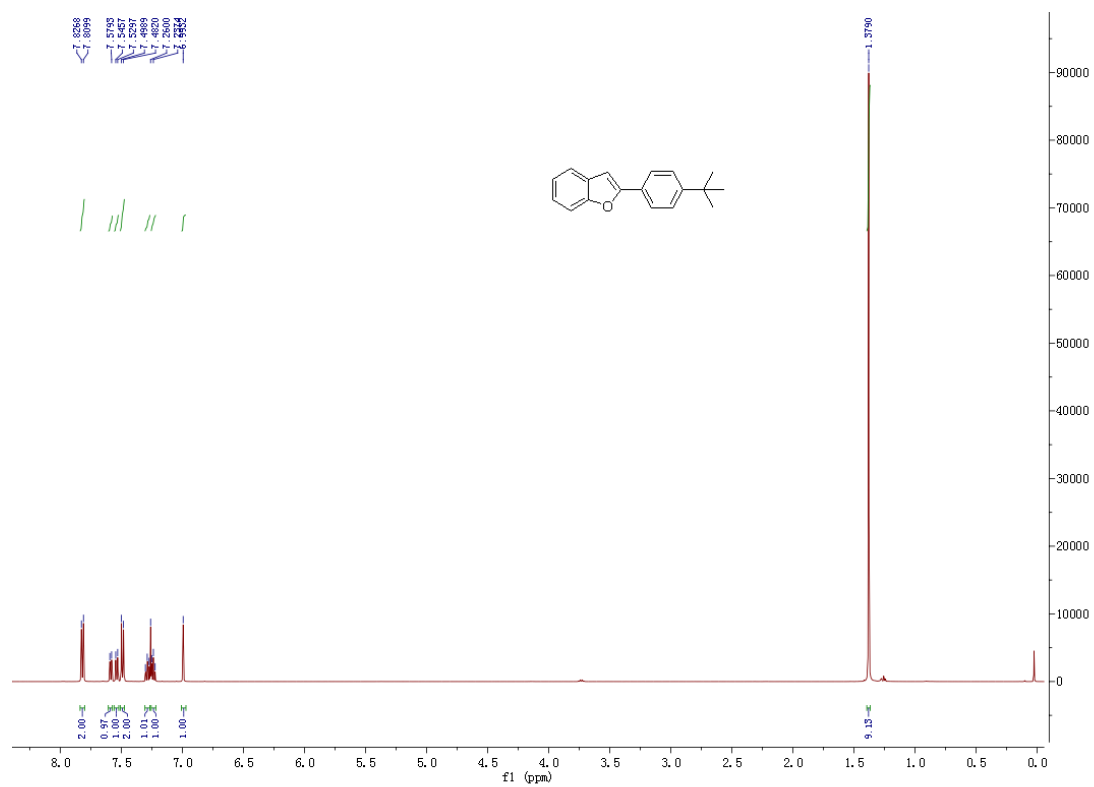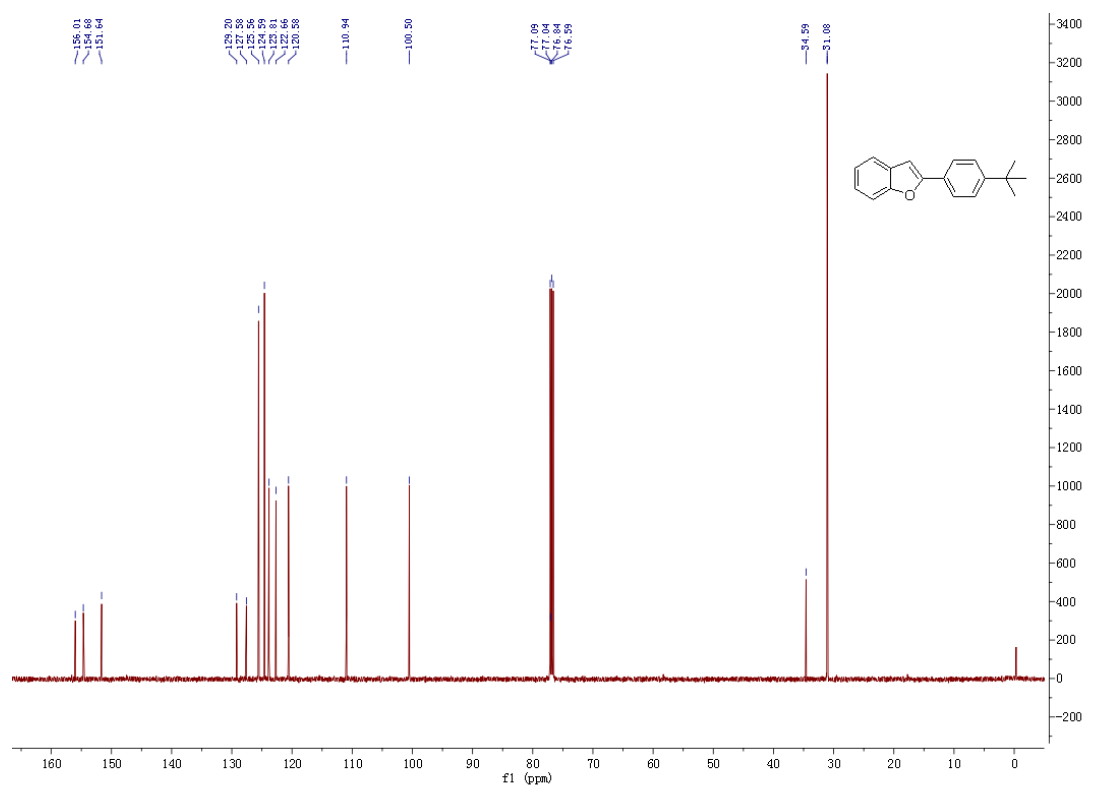

**Figure S5.**  $^1\text{H NMR}$  of **3e** (500 MHz,  $\text{CDCl}_3$ ) and  $^{13}\text{C NMR}$  of **3e** (125 MHz,  $\text{CDCl}_3$ ).

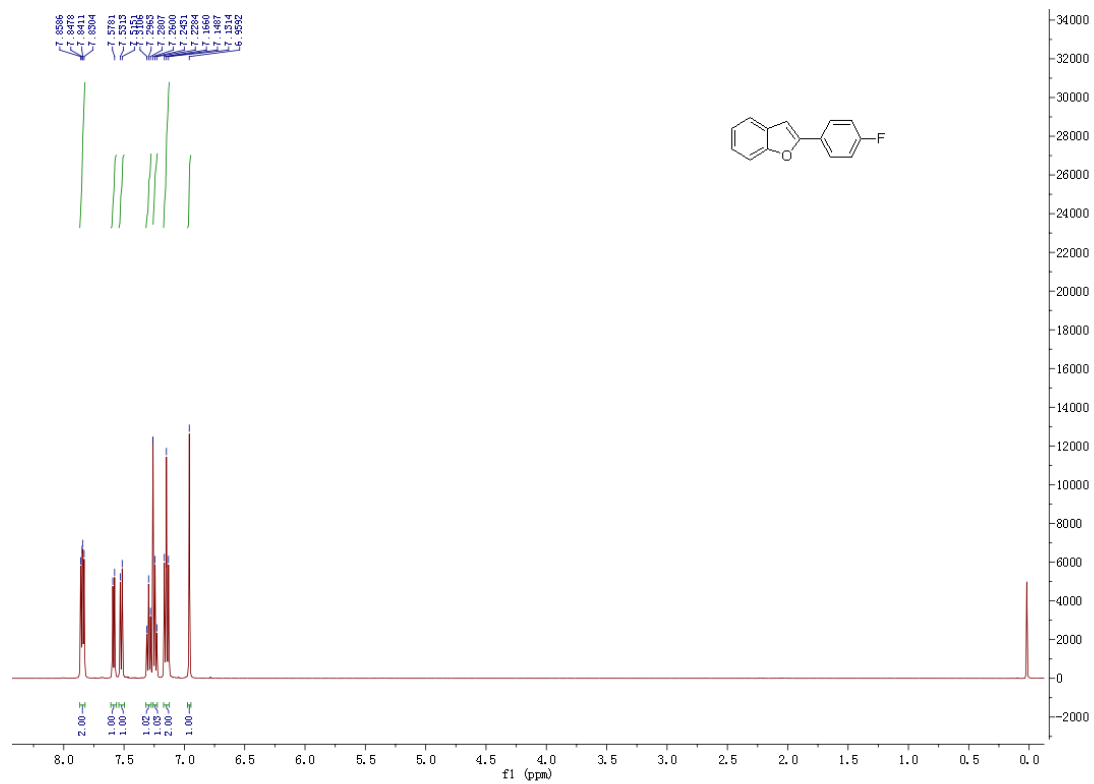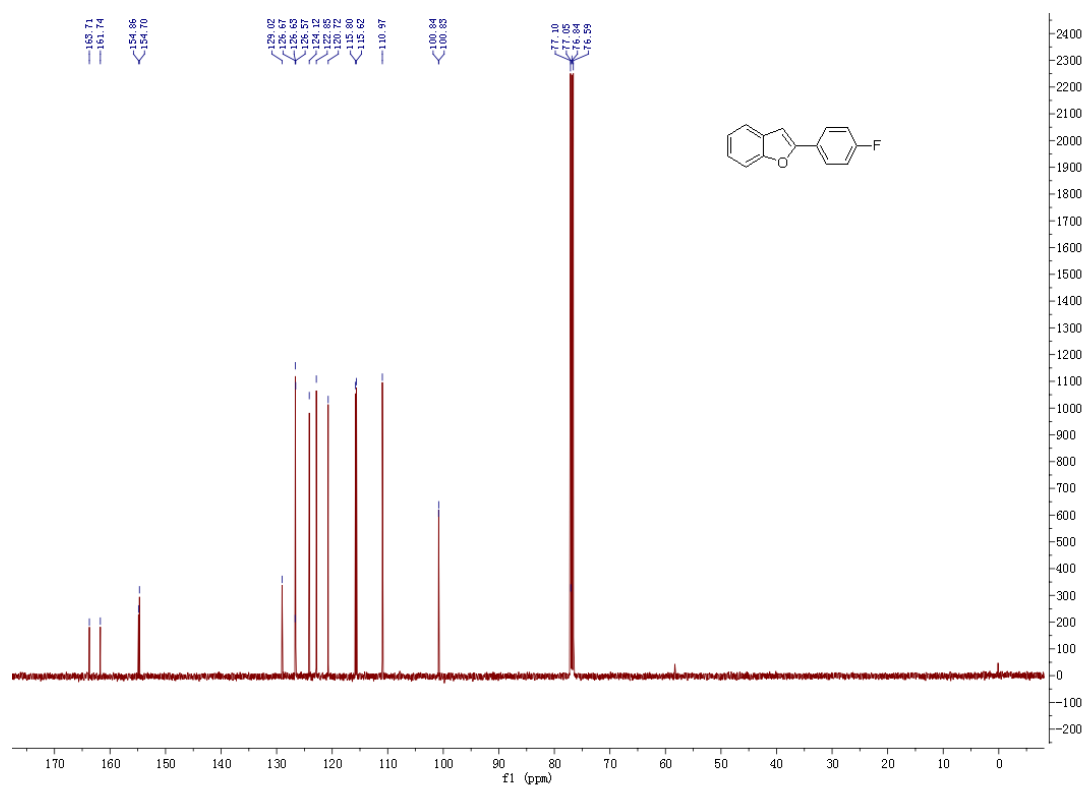

**Figure S6.** <sup>1</sup>H NMR of **3f** (500 MHz, CDCl<sub>3</sub>) and <sup>13</sup>C NMR of **3f** (125 MHz, CDCl<sub>3</sub>).

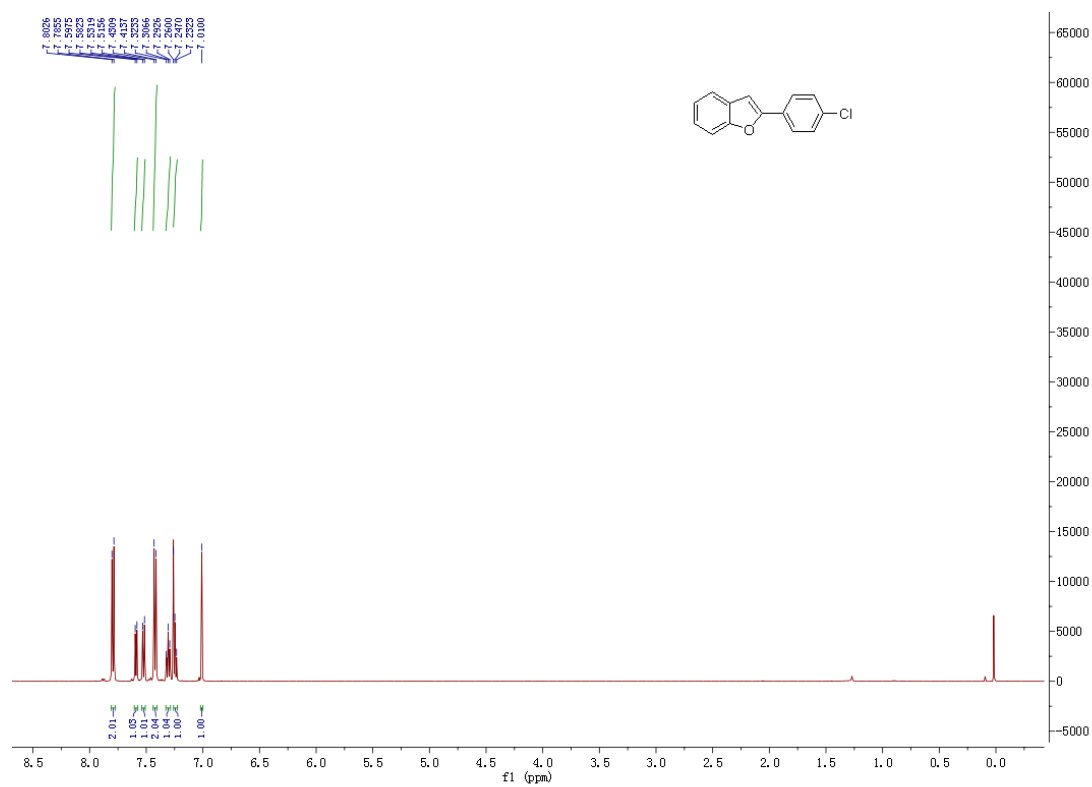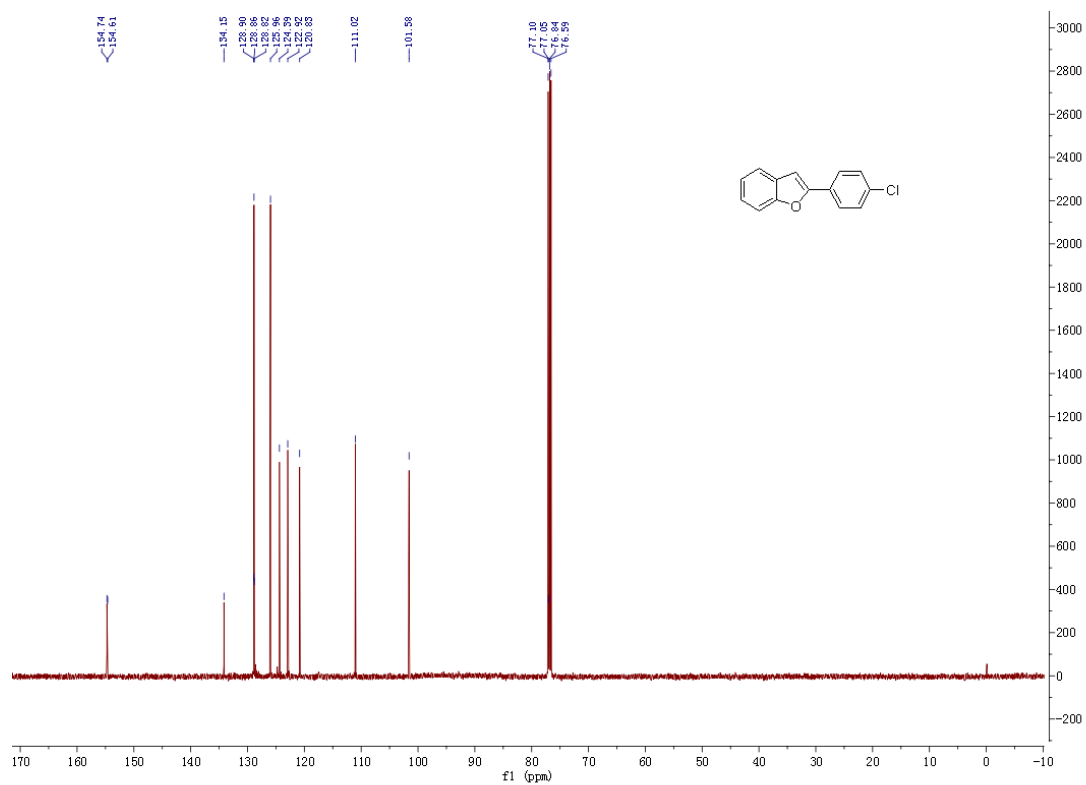

**Figure S7.**  $^1\text{H NMR}$  of **3g** (500 MHz,  $\text{CDCl}_3$ ) and  $^{13}\text{C NMR}$  of **3g** (125 MHz,  $\text{CDCl}_3$ ).



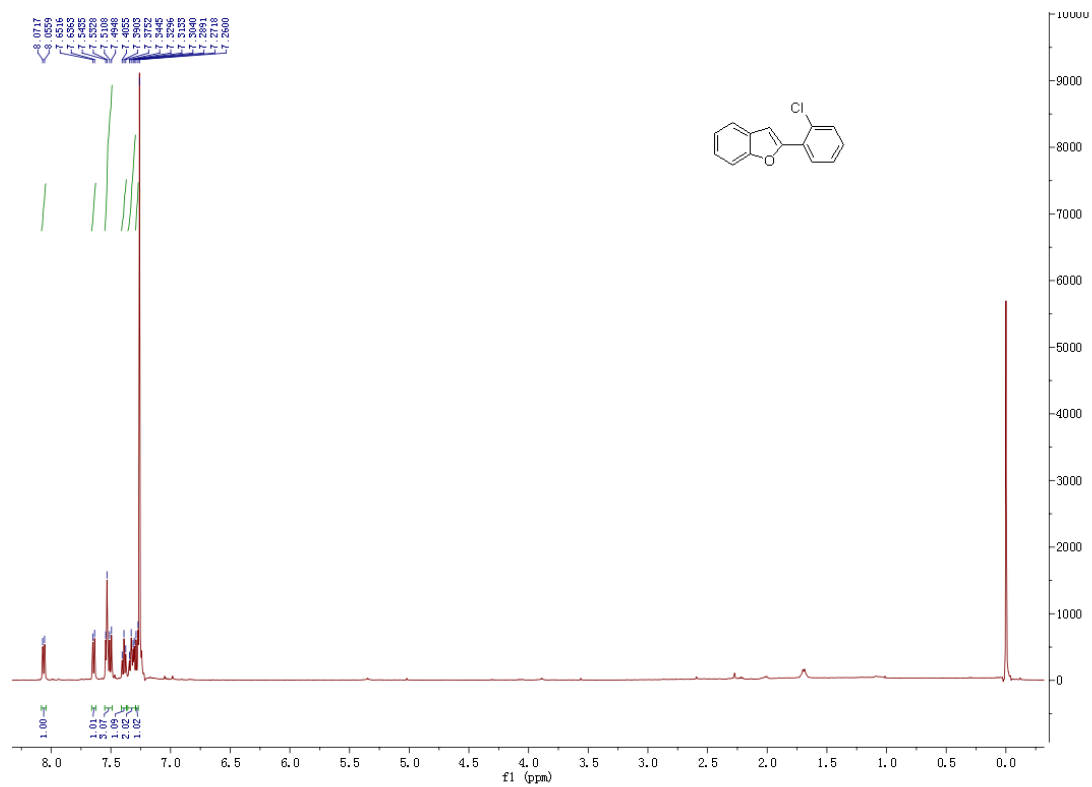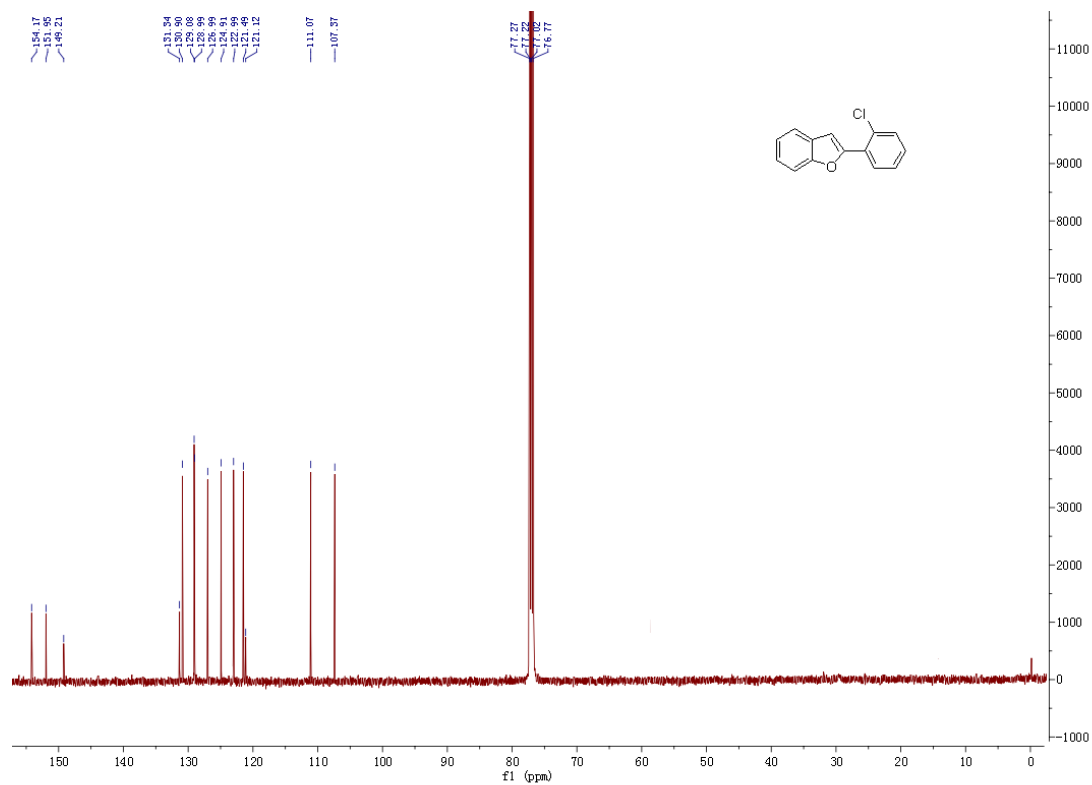

**Figure S8.** <sup>1</sup>H NMR of **3h** (500 MHz, CDCl<sub>3</sub>) and <sup>13</sup>C NMR of **3h** (125 MHz, CDCl<sub>3</sub>).

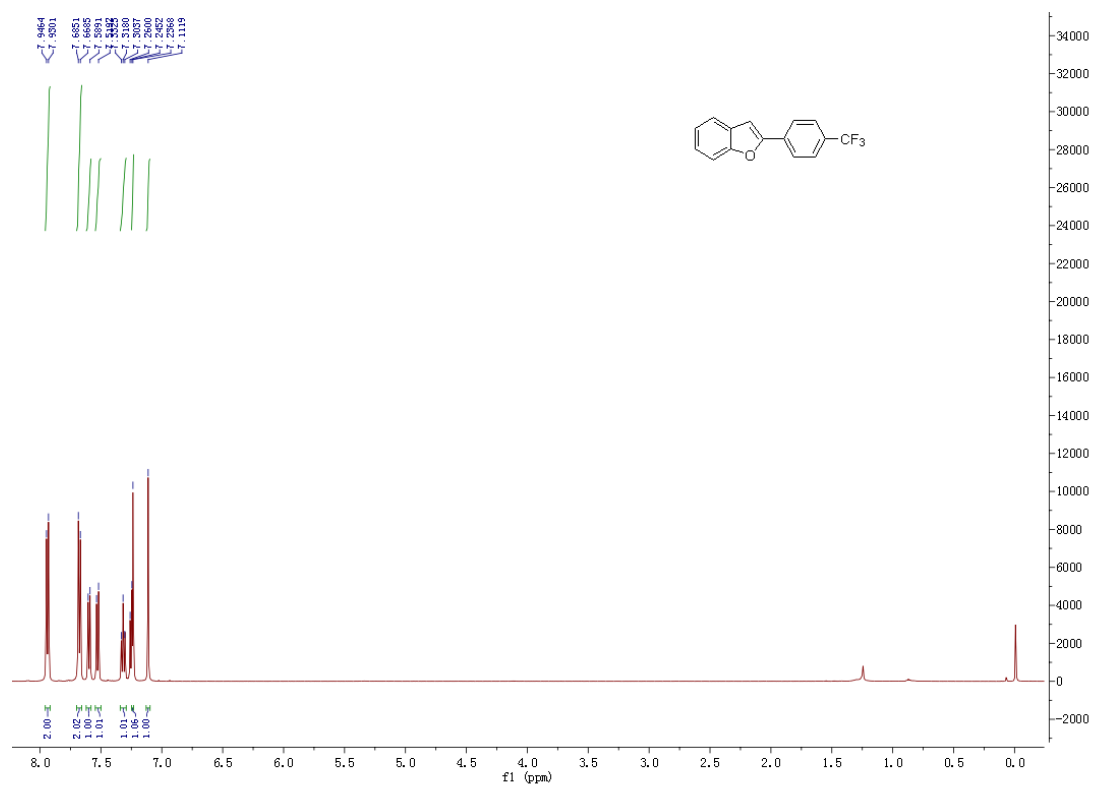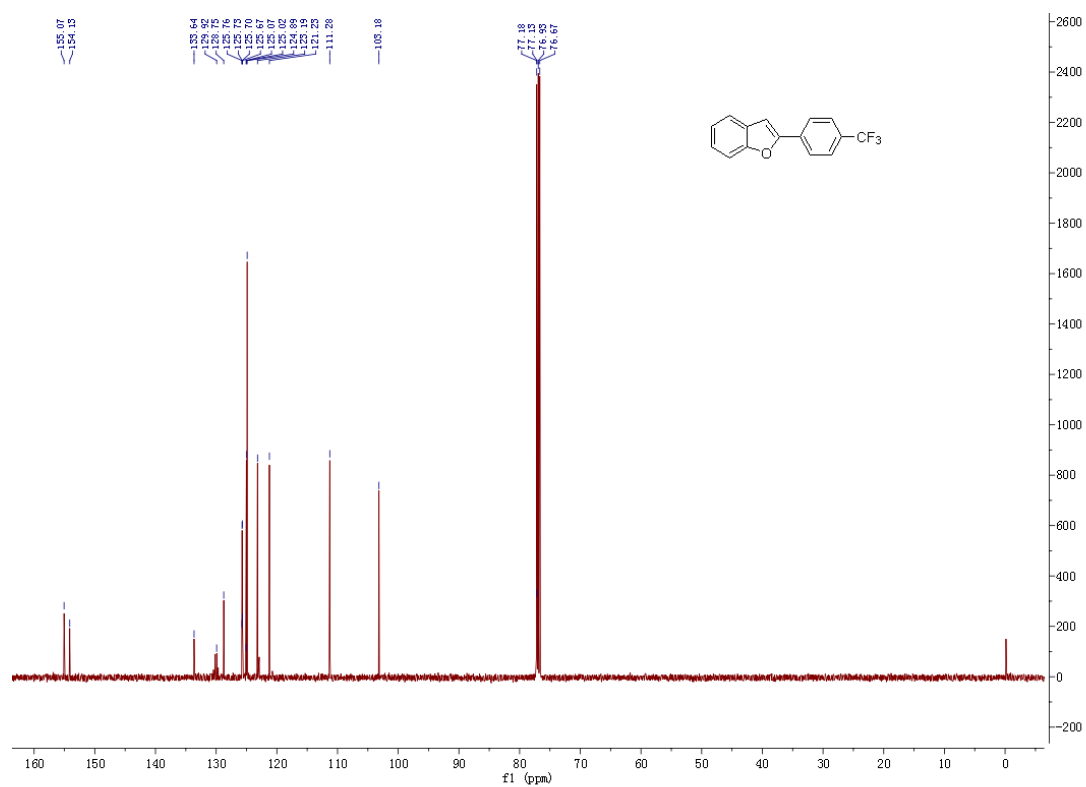

**Figure S9.** <sup>1</sup>H NMR of **3i** (500 MHz, CDCl<sub>3</sub>) and <sup>13</sup>C NMR of **3i** (125 MHz, CDCl<sub>3</sub>).

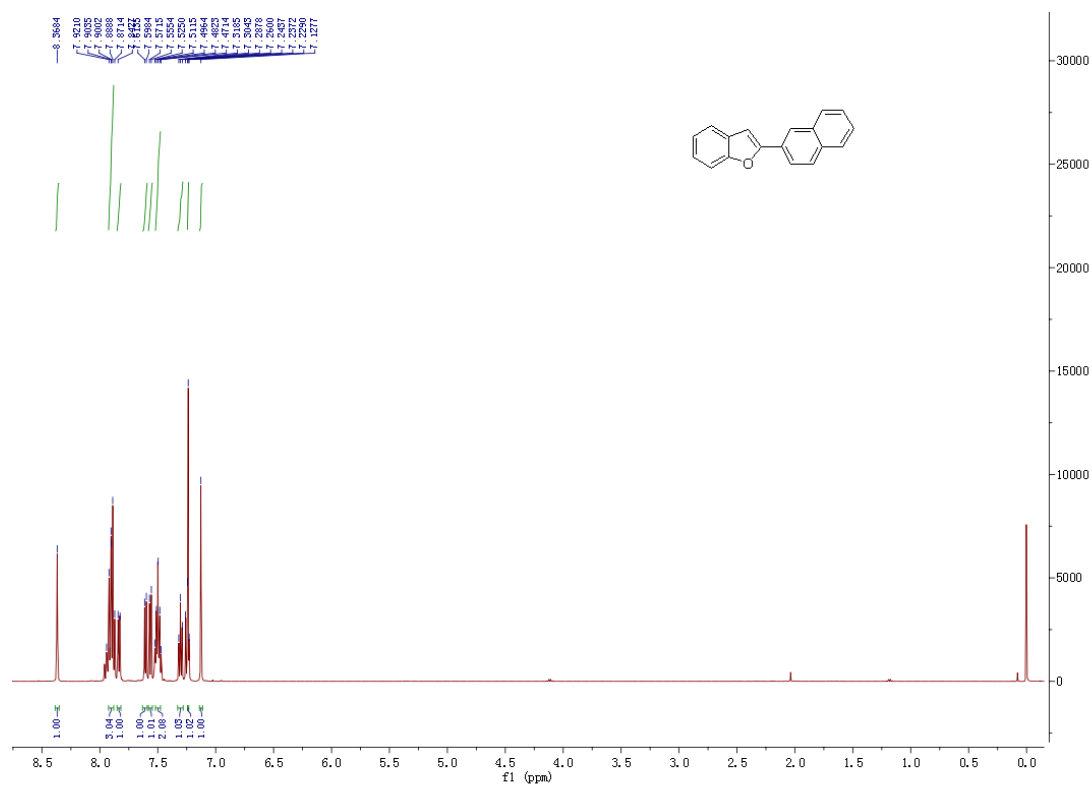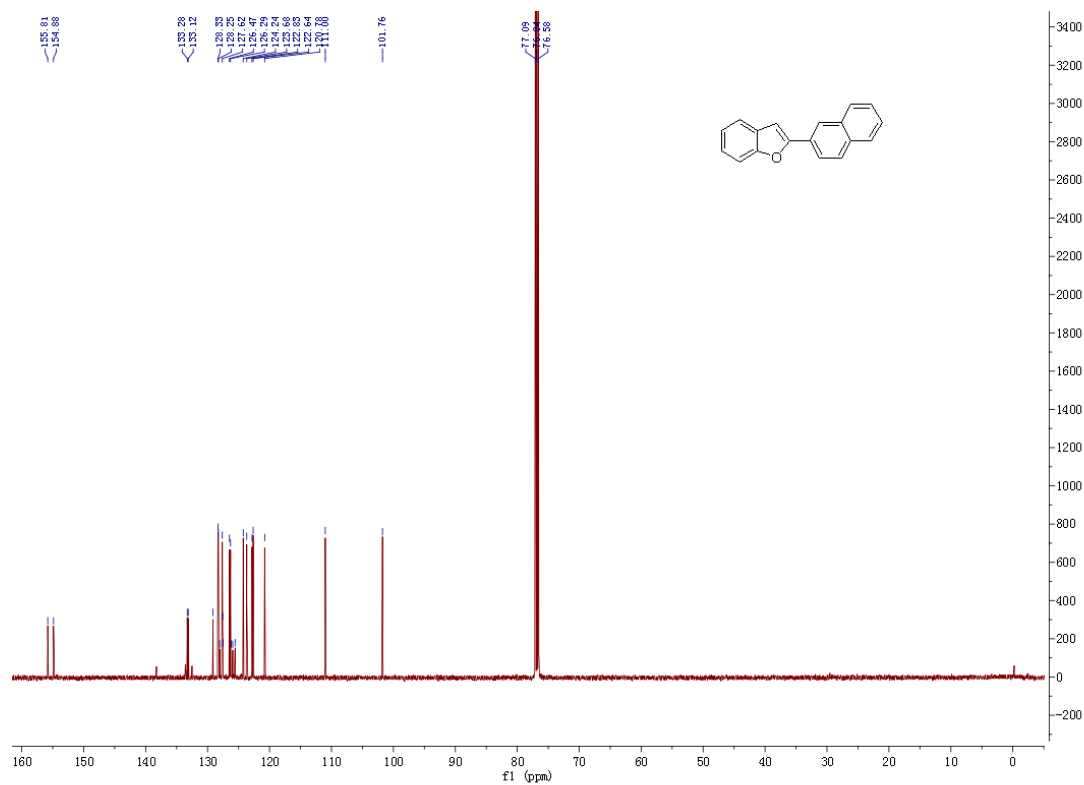

Figure S10. <sup>1</sup>H NMR of **3j** (500 MHz, CDCl<sub>3</sub>) and <sup>13</sup>C NMR of **3j** (125 MHz, CDCl<sub>3</sub>).

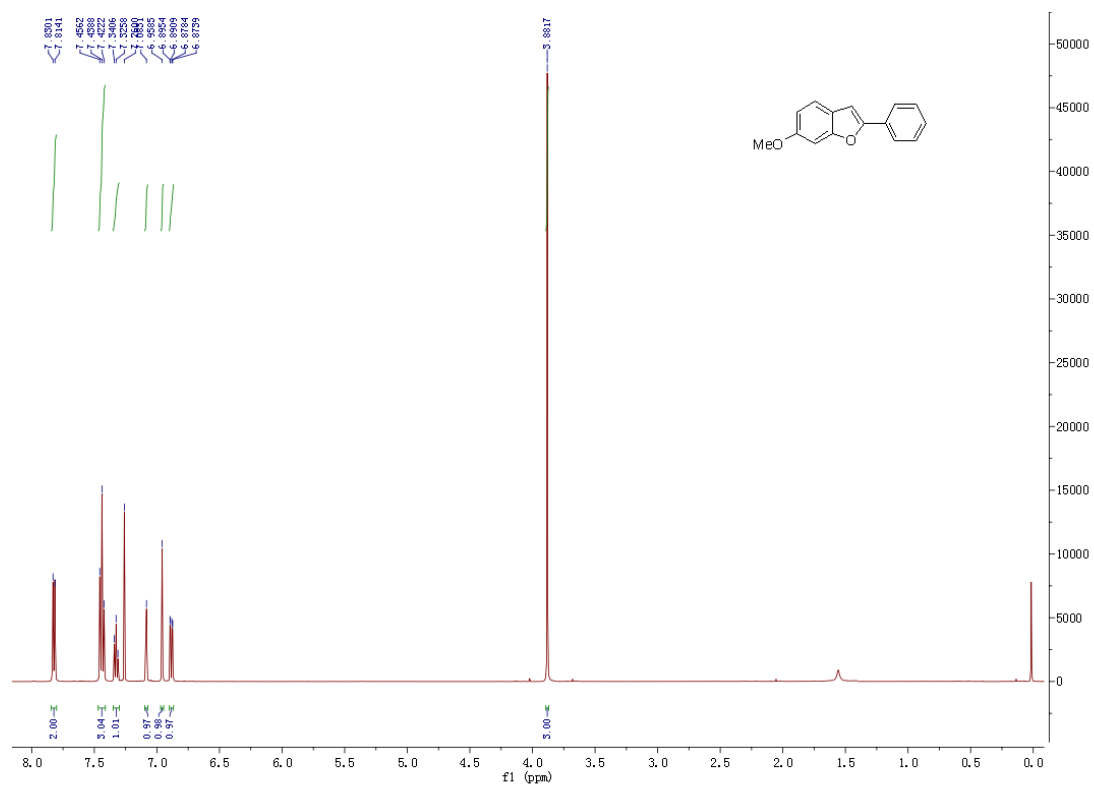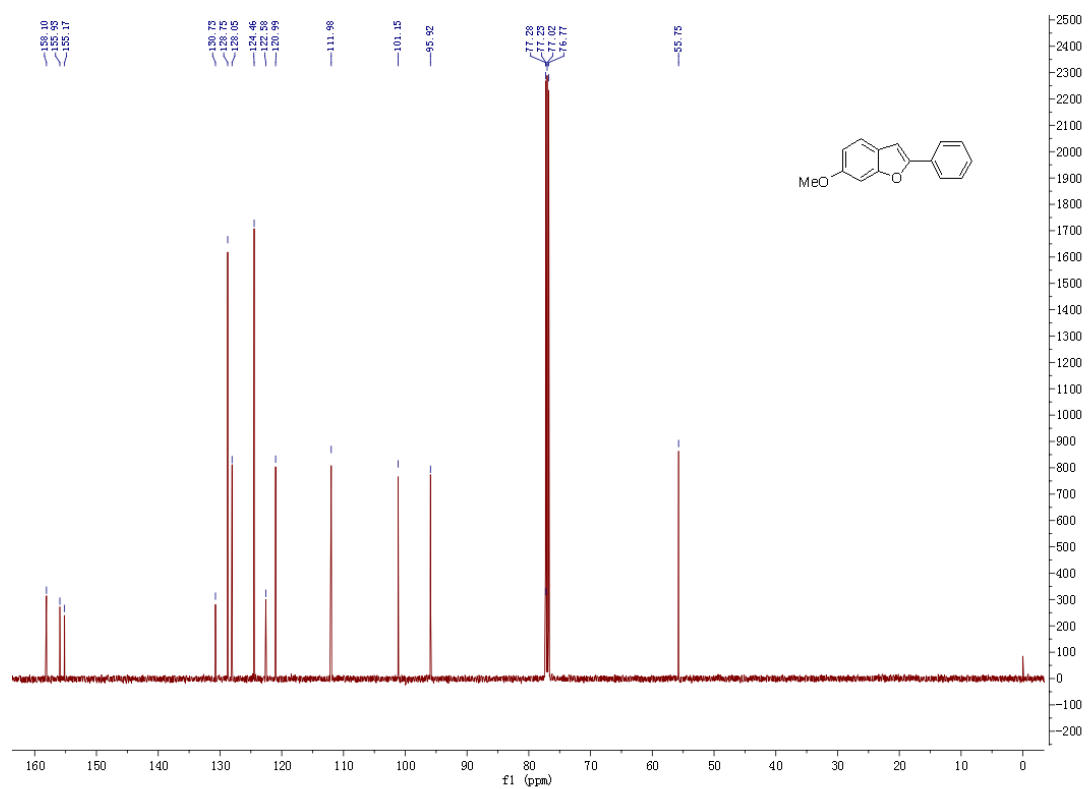

Figure S11.  $^1\text{H}$  NMR of **3k** (500 MHz,  $\text{CDCl}_3$ ) and  $^{13}\text{C}$  NMR of **3k** (125 MHz,  $\text{CDCl}_3$ ).

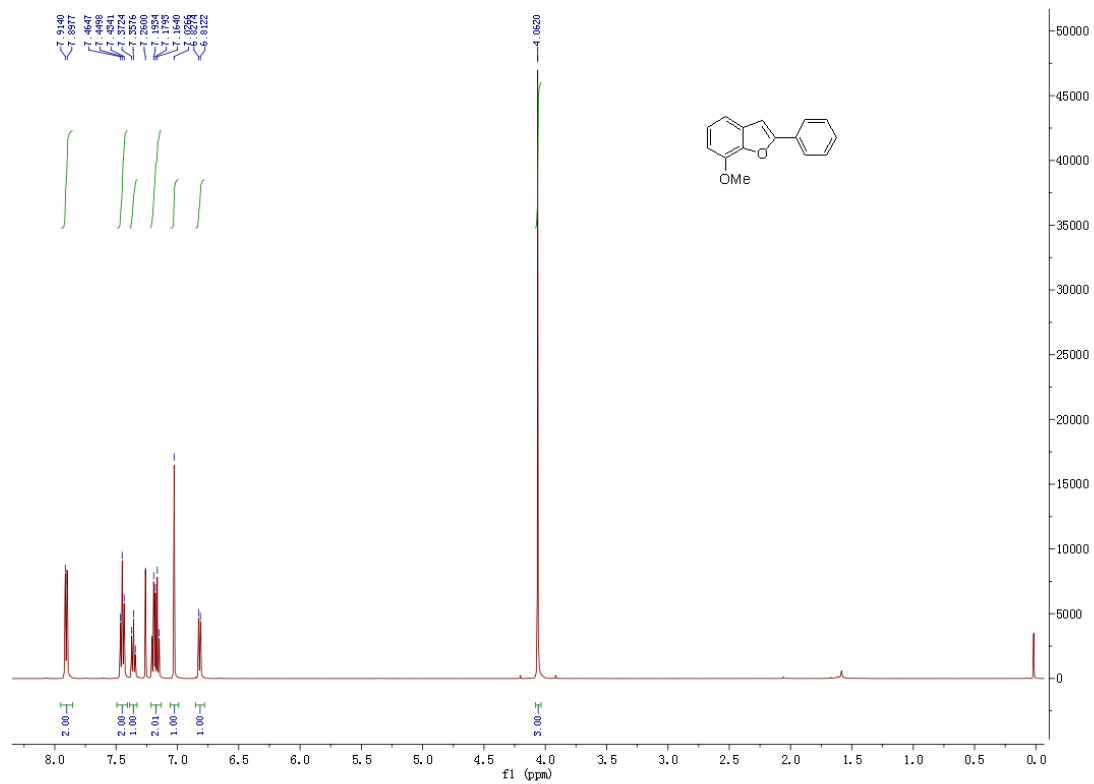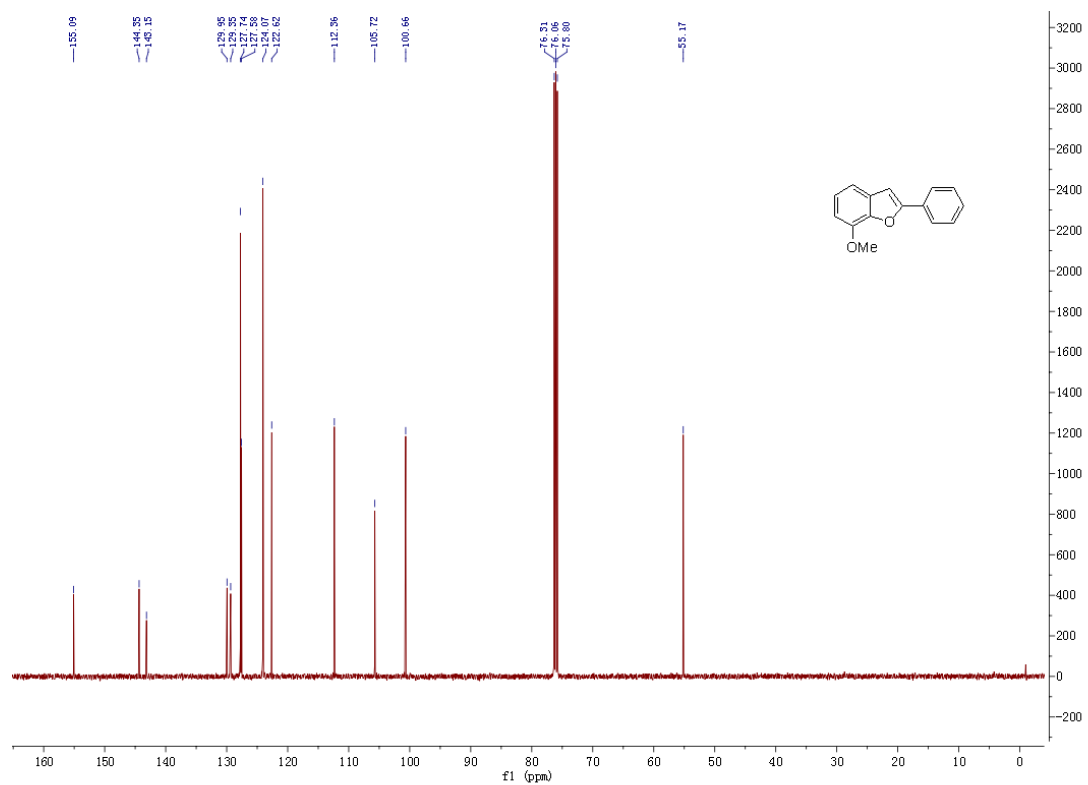

**Figure S12.** <sup>1</sup>H NMR of **31** (500 MHz, CDCl<sub>3</sub>) and <sup>13</sup>C NMR of **31** (125 MHz, CDCl<sub>3</sub>).

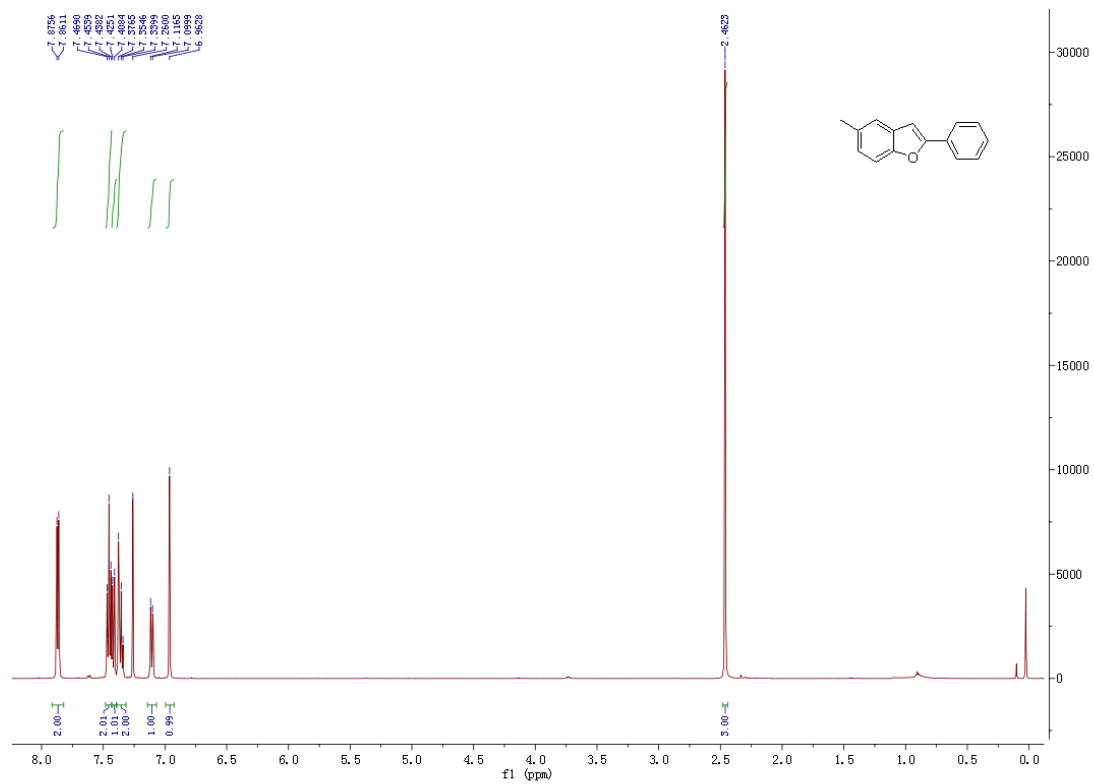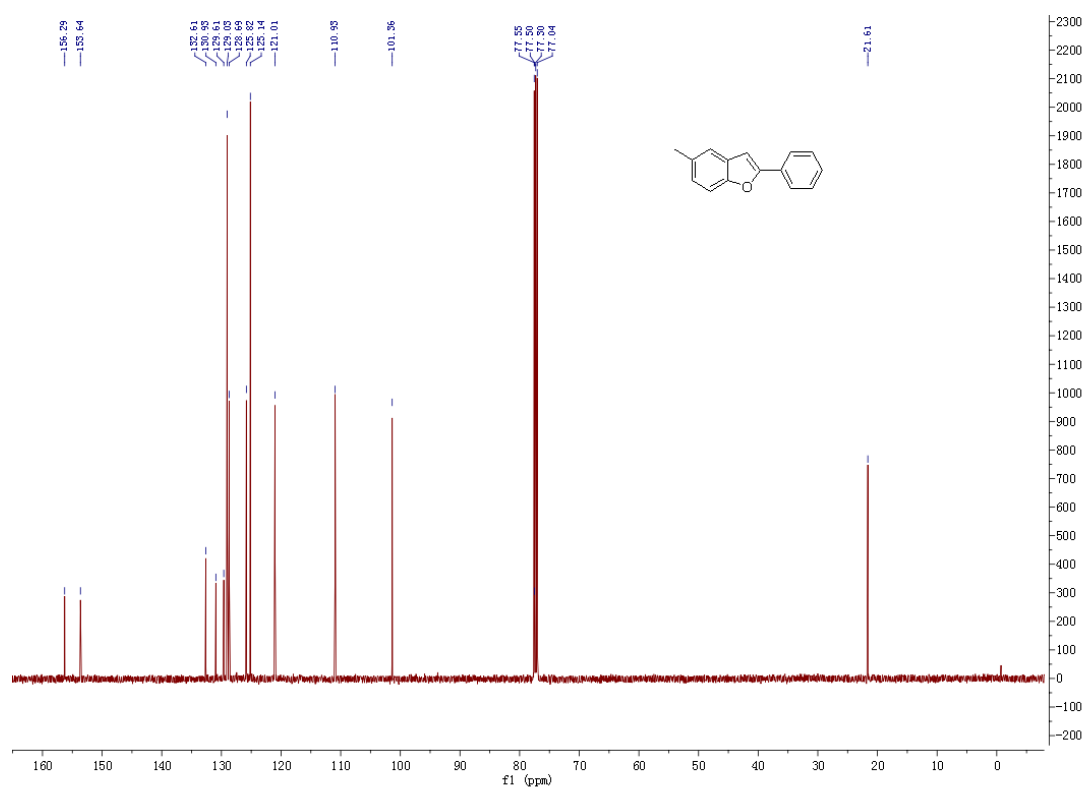

**Figure S13.** <sup>1</sup>H NMR of **3m** (500 MHz, CDCl<sub>3</sub>) and <sup>13</sup>C NMR of **3m** (125 MHz, CDCl<sub>3</sub>).

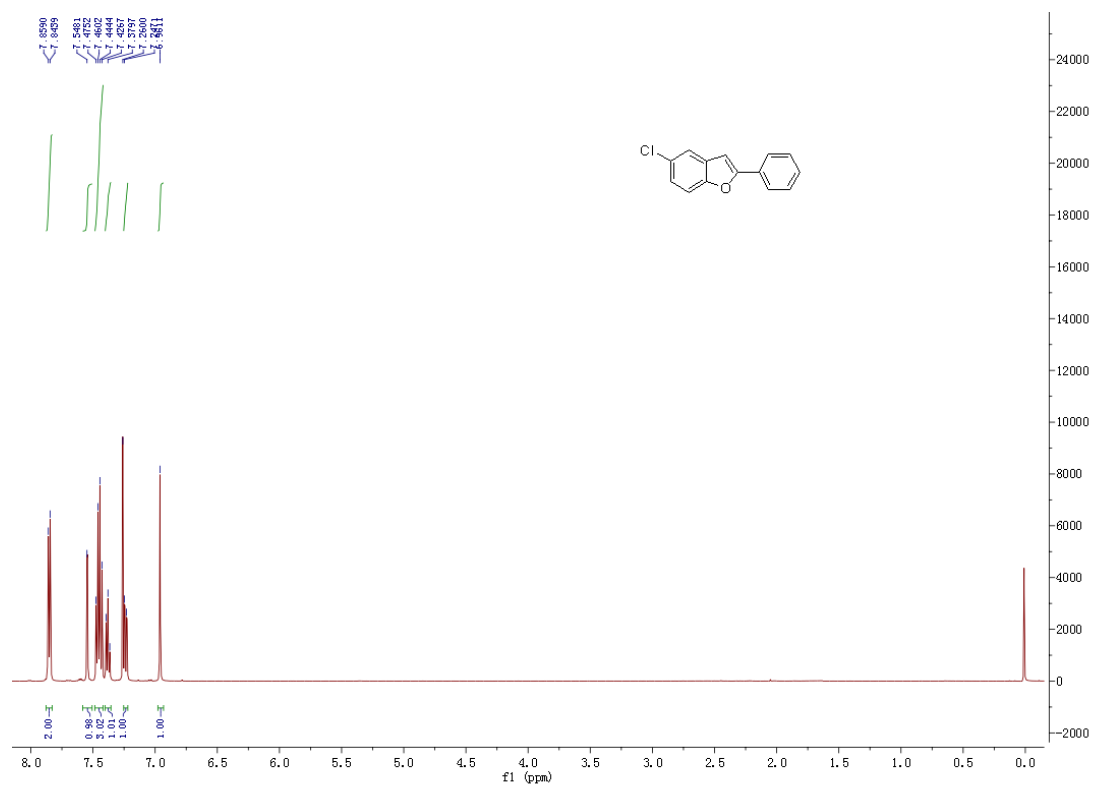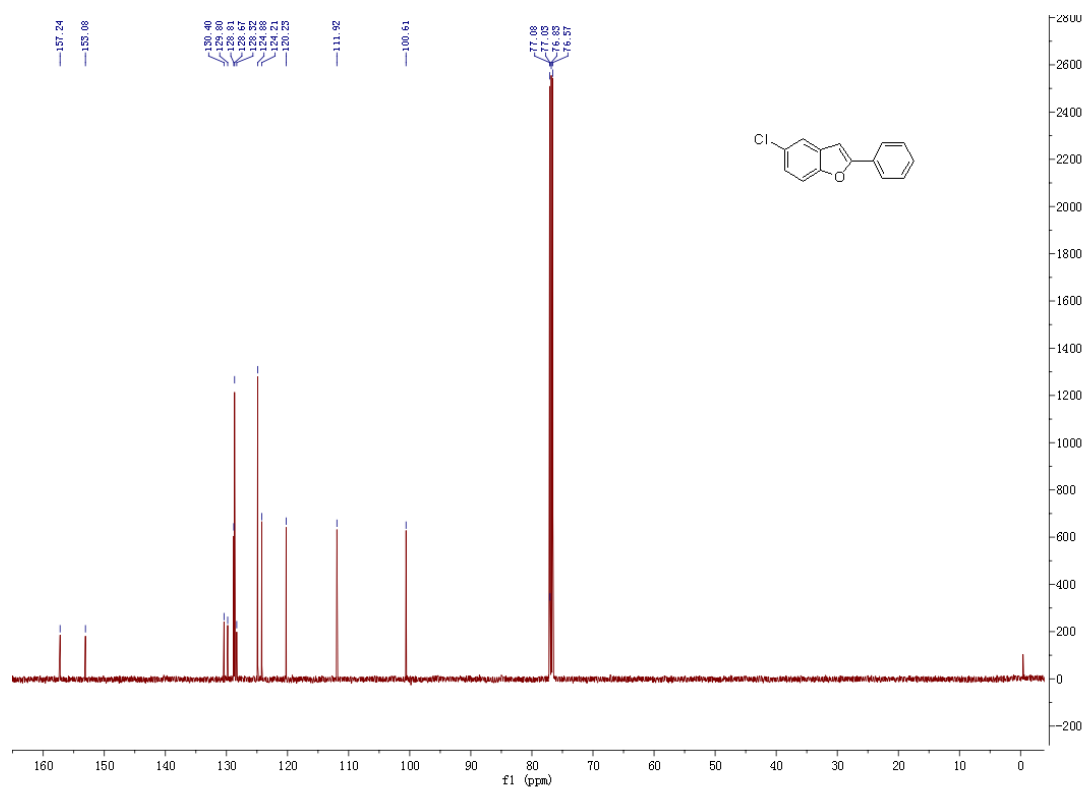

**Figure S14.** <sup>1</sup>H NMR of **3n** (500 MHz, CDCl<sub>3</sub>) and <sup>13</sup>C NMR of **3n** (125 MHz, CDCl<sub>3</sub>).

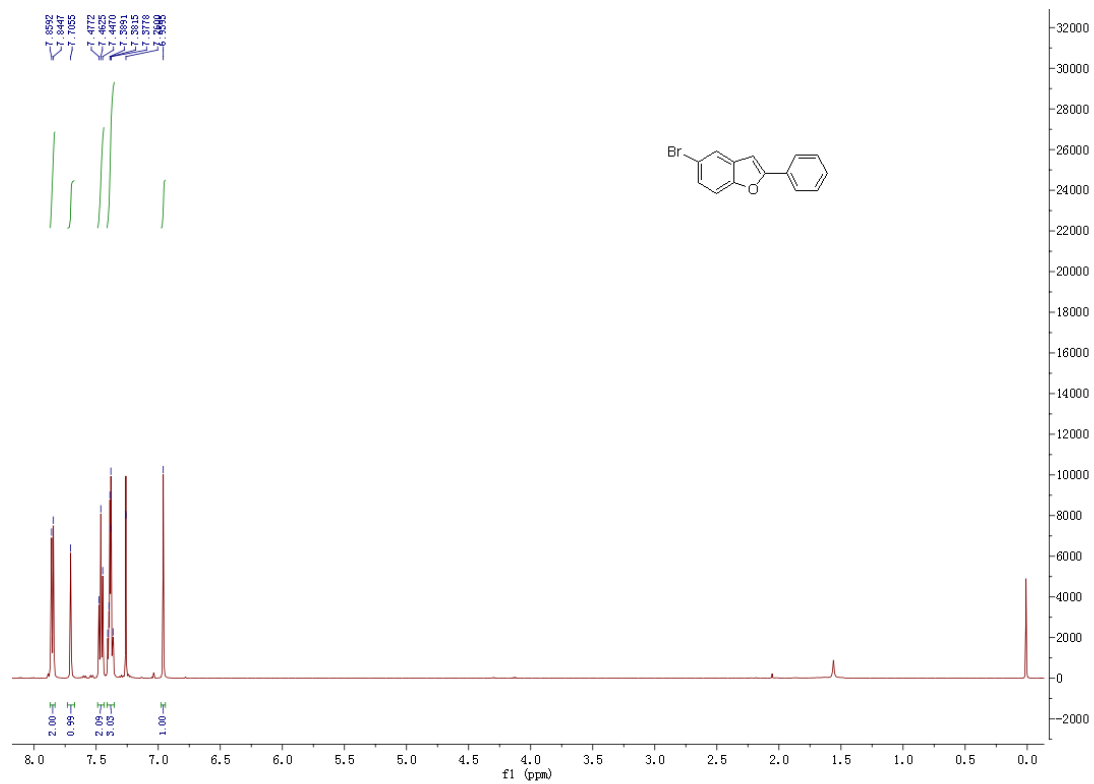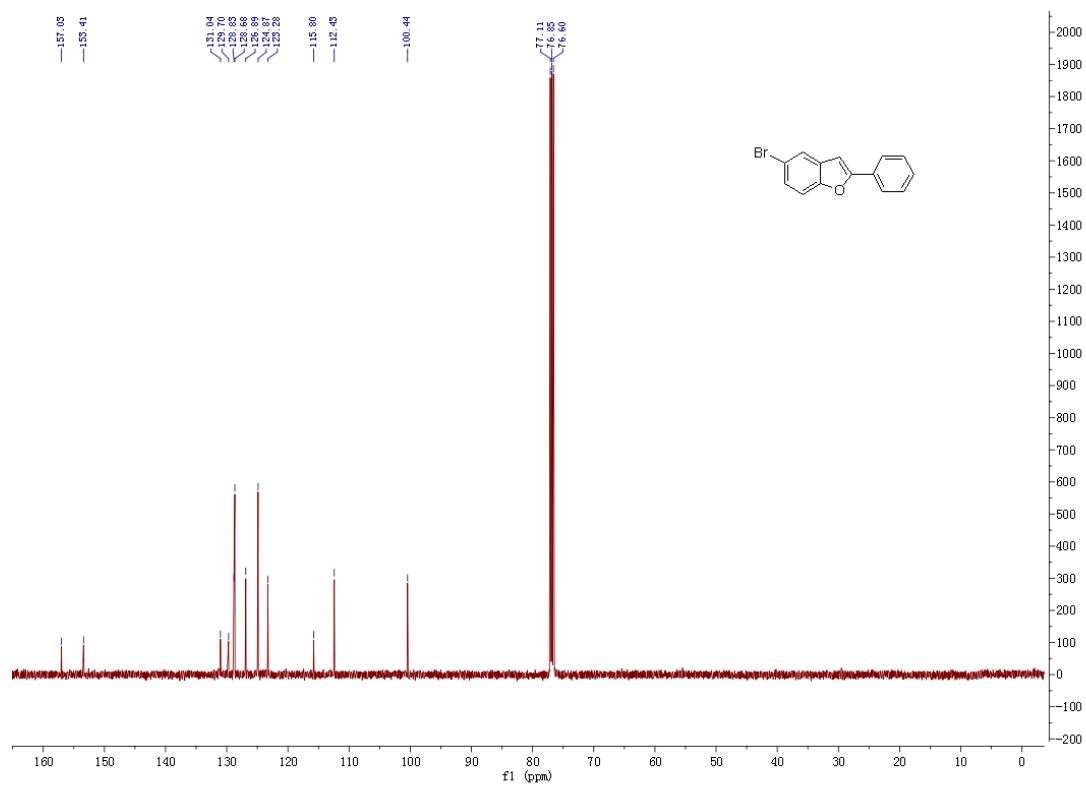

**Figure S15.** <sup>1</sup>H NMR of **3o** (500 MHz, CDCl<sub>3</sub>) and <sup>13</sup>C NMR of **3o** (125 MHz, CDCl<sub>3</sub>).



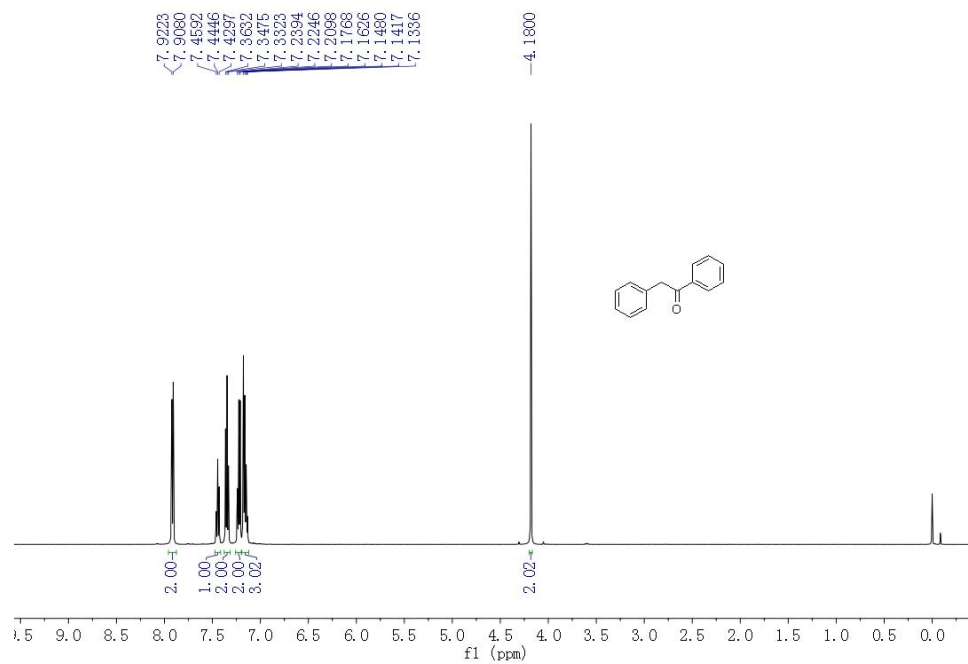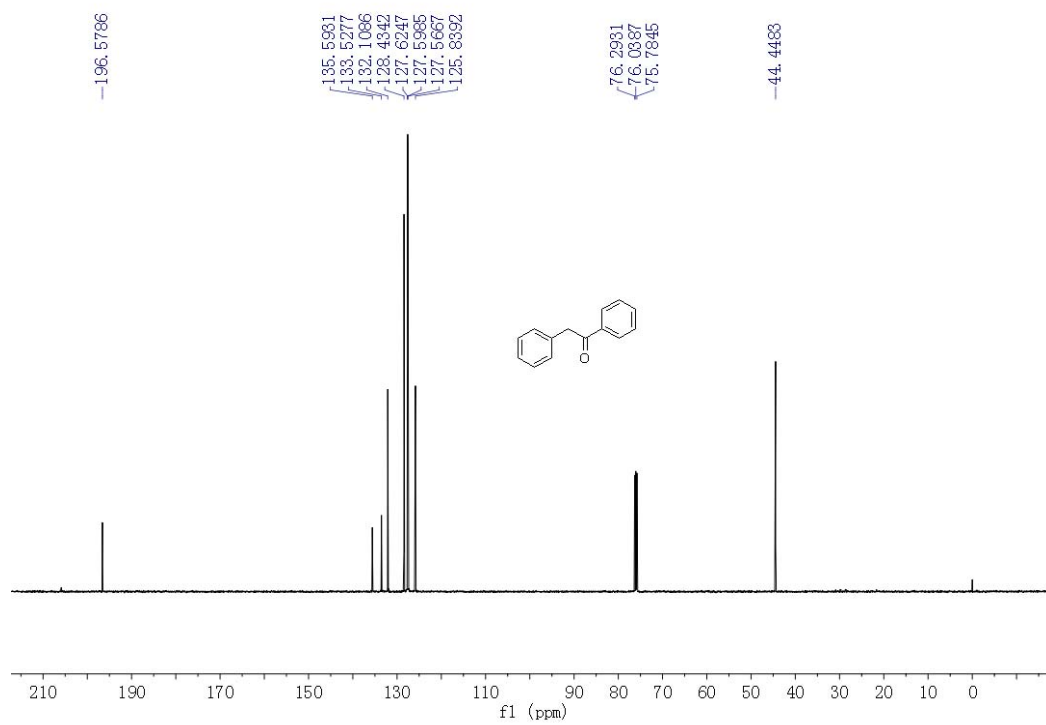

**Figure S16.** <sup>1</sup>H NMR of **5** (500 MHz, CDCl<sub>3</sub>) and <sup>13</sup>C NMR of **5** (125 MHz, CDCl<sub>3</sub>).
